# Supplementary material for: The thio-adduct facilitated, enzymatic kinetic resolution of 4-hydroxycyclopentenone and 4-hydroxycyclohexenone
Source: Royal Society of Chemistry journal article supplement (doi:10.1039/b916506a), 2009-11-30

Electronic Supporting Information

**The Thio-adduct Facilitated, Enzymatic Kinetic Resolution of 4-Hydroxycyclopentenone and 4-Hydroxycyclohexenone**

Aisling O'Byrne,<sup>a</sup> Cian Murray,<sup>a</sup> Dearbhla Keegan,<sup>a</sup> Carole Palacio,<sup>a</sup> Paul Evans<sup>a\*</sup> and Ben S. Morgan,<sup>b</sup>

<sup>a</sup>*Centre for Synthesis and Chemical Biology, School of Chemistry and Chemical Biology, University College Dublin, Dublin 4, Ireland. Email: paul.evans@ucd.ie*

<sup>b</sup>*Department of Chemistry, University of Liverpool, L69 7ZD, UK*

| <b>Contents:</b>                                                          | <b>Pages</b> |
|---------------------------------------------------------------------------|--------------|
| <b>General</b>                                                            | 1            |
| <b>(±)-4-Hydroxycyclopent-2-enone 1</b>                                   | 1            |
| <b>Synthesis of (+)- and (-)-6a</b>                                       | 2-3          |
| <b>Synthesis of (+)- and (-)-12</b>                                       | 4-6          |
| <b>Synthesis of 3,4-Dimethoxybenzyl thiol 8</b>                           | 6-8          |
| <b>Synthesis of (+)- and (-)-6b</b>                                       | 8-10         |
| <b>Synthesis of (±)-4-Hydroxycyclohex-2-enone 15</b>                      | 10-12        |
| <b>Reduction of (±)-4-(tert-Butyldimethylsilyloxy)cyclohex-2-enone 19</b> | 12-14        |
| <b>Cope-type sulfoxide elimination for conversion of (-)-17 to (-)-19</b> | 14-19        |
| <b>References</b>                                                         | 19-20        |
| <b>Selected <sup>1</sup>H, <sup>13</sup>C spectra and HPLC traces</b>     | 21-41        |

## General

Reagents were obtained from commercial suppliers. Dry THF and diethyl ether were distilled from sodium benzophenone ketyl radical and dry  $\text{CH}_2\text{Cl}_2$  distilled from calcium hydride, under nitrogen. Low reaction temperatures were obtained with an acetone/solid  $\text{CO}_2$  bath. Thin-layer chromatography was performed on silica coated aluminium sheets (60 F<sub>254</sub>) supplied by Merck. Flash column chromatography was performed using flash silica 60 Å (230-400 mesh) 9385 supplied by Merck.  $^1\text{H}$  and  $^{13}\text{C}$  NMR spectra were recorded using Varian Inova 300 MHz, 400 MHz and 500 MHz instruments. Deuteriochloroform was used as the solvent and chemical shifts are given in ppm relative to the standard reference TMS or residual chloroform. Infrared spectra were recorded on a Mattson Instruments Galaxy series FT-IR 3000 spectrometer. Melting points were recorded on a Gallenkamp electrothermal melting point apparatus and are uncorrected. High resolution mass spectra were carried out on a VG analytical 70-E mass spectrometer. The names of compounds provided were generated using the Autonom programme on the Beilstein chemical database. Optical rotation data was obtained using a Perkin Elmer Model 343 polarimeter and values are quoted in units of  $10^{-1}\text{degcm}^2\text{g}^{-1}$ .

### (±)-4-Hydroxycyclopent-2-enone **1**:<sup>1</sup>

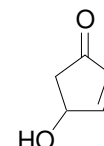

Furfuryl alcohol **2** (7.35 mL, 85.0 mmol, 1.00 equiv.) and potassium dihydrogen orthophosphate (2.109 g, 15.5 mmol, 0.18 equiv.) were dissolved in water (0.5 L). The solution was degassed with a stream of nitrogen along with stirring for 1 h. The reaction was heated to reflux for 48 h and then cooled to room temperature. The aqueous layer was washed with EtOAc (2 x 100 mL), the combined organic layers were checked for product by NMR and then discarded. The aqueous layer was concentrated almost to dryness (ca. 25 mL) under reduced pressure and the residue was then thoroughly extracted with EtOAc (5 x 20 mL). The combined organic layers were dried over  $\text{MgSO}_4$ , filtered and the solvent removed under reduced pressure. The title compound **1** was obtained as a brown oil (2.943 g, 30% yield).  $R_f$  = 0.1 (cyclohexane-EtOAc; 1:1);  $\nu_{\text{max}}$  (neat/ $\text{cm}^{-1}$ ) 3417, 2920, 2704, 1712, 1586, 1405, 1343, 1190, 1154, 1104, 1045, 947, 797;  $\delta_{\text{H}}$  (400 MHz,  $\text{CDCl}_3$ ) 2.25 (1H, dd,  $J$  = 2.0, 18.5 Hz,  $\text{CH}_2$ ), 2.75 (1H, dd,  $J$  = 6.0, 18.5 Hz,  $\text{CH}_2$ ), 5.00-5.03 (1H, m, CH), 6.20 (1H, dd,  $J$  = 1.5, 5.5 Hz, CH), 7.57 (1H, dd,  $J$  = 2.5, 5.5 Hz, CH);  $\delta_{\text{C}}$  NMR (100 MHz,  $\text{CDCl}_3$ ) 44.2 ( $\text{CH}_2$ ), 70.2 (CH), 134.9 (CH), 163.8 (CH), 207.2 (CO).

## Synthesis of (+)- and (-)-6a

### (±)-*cis*-3-Benzylthio-4-hydroxycyclopentanone (±)-4a:

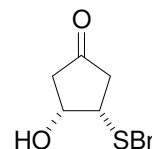

To (±)-4-hydroxycyclopent-2-enone **1** (1.717 g, 17.5 mmol, 1.0 equiv.), dissolved in dichloromethane (40 mL), benzyl mercaptan (1.85 mL, 15.8 mmol, 0.9 equiv.) and triethylamine (0.24 mL, 1.8 mmol, 0.1 equiv.) were added dropwise. The reaction mixture was stirred at room temperature for 24 h. The solvent was removed under reduced pressure and the residue purified by column chromatography (cyclohexane-EtOAc, 4:1) to afford the title compound (±)-**4a** (2.801 g, 80%) as a white solid with data as reported previously.<sup>2</sup>  $R_f = 0.1$  (cyclohexane-EtOAc, 4:1).

### (±)-*trans*-3-Benzylthio-4-hydroxycyclopentanone (±)-*trans*-4a:

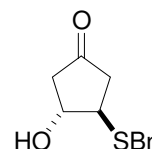

To (±)-4-hydroxycyclopent-2-enone **1** (200 mg, 2.04 mmol, 1.0 equiv.), dissolved in ethanol (5 mL), benzyl mercaptan (0.22 mL, 1.83 mmol, 0.9 equiv.) and triethylamine (30  $\mu$ L, 0.20 mmol, 0.1 equiv.) were added dropwise. The reaction mixture was stirred at room temperature for 24 h. The solvent was removed under reduced pressure and the residue purified by column chromatography (CH<sub>2</sub>Cl<sub>2</sub>-MeOH, 100:1) to afford (±)-*cis*-**4a** (86 mg, 19 %) as white solid.  $R_f = 0.2$  (CH<sub>2</sub>Cl<sub>2</sub>-MeOH, 100:1). Further elution gave (±)-*trans*-**4a** (231 mg, 51%) as a clear, viscous oil whose data was in accordance with that reported previously.  $R_f = 0.1$  (CH<sub>2</sub>Cl<sub>2</sub>-MeOH, 100:1).<sup>2</sup>

### (*S*)-4-(Benzylthio)cyclopent-2-enone (–)-6a and (3*R*,4*S*)-3-(Benzylthio)-4-hydroxycyclopentanone (–)-4a:

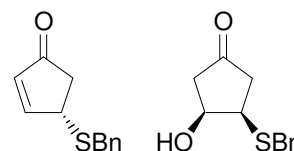

To *cis*-3-benzylthio-4-hydroxycyclopentanone ( $\pm$ )-**4a** (2.290 g, 10.3 mmol, 1 equiv.) dissolved in diisopropyl ether (220 mL), vinyl acetate (4.75 mL, 51.5 mmol, 5 equiv.) and *Candida antarctica* Lipase B [2.290 g, 1:1 *w/w* (enzyme:substrate)] were added. The reaction was shaken for 16 h and monitored by  $^1\text{H}$  NMR spectroscopy. The mixture was filtered, and the enzyme residue washed with diisopropyl ether ( $2 \times 30$  mL). The solvent was removed under reduced pressure and the residue was dissolved in THF (50 mL) and cooled to 0 °C. Triethylamine (1.44 mL, 10.3 mmol, 1 equiv.) was added dropwise and the reaction stirred for 30 min. NMR showed that the reaction was complete. The solvent was removed under reduced pressure and the residue purified by column chromatography (cyclohexane-EtOAc, 8:1) to afford (*S*)-4-(benzylthio)cyclopent-2-enone (–)-**6a** (1.013 g, 48%) as a colourless oil.  $R_f = 0.1$  (cyclohexane-EtOAc, 8:1);  $\nu_{\text{max}}$  (neat/ $\text{cm}^{-1}$ ) 3061, 3029, 2919, 1953, 1716, 1582, 1495, 1454, 1400, 1341, 1240, 1180, 1096, 1028, 940, 831, 771, 704;  $\delta_{\text{H}}$  (400 MHz,  $\text{CDCl}_3$ ) 2.25 (1H, dd,  $J = 2.0, 19.0$  Hz,  $\text{CH}_2$ ), 2.67 (1H, dd,  $J = 6.5, 19.0$  Hz,  $\text{CH}_2$ ), 3.71 (1H, d,  $J = 13.5$  Hz,  $\text{CH}_2$ ) 3.76 (1H, d,  $J = 13.5$  Hz,  $\text{CH}_2$ ), 3.85–3.88 (1H, m, CH), 6.13 (1H, dd,  $J = 1.5, 5.5$  Hz, CH), 7.22–7.28 (5H, m, ArH), 7.41 (1H, dd,  $J = 2.5, 5.5$  Hz, CH);  $\delta_{\text{C}}$  (100 MHz,  $\text{CDCl}_3$ ) 35.5 ( $\text{CH}_2$ ), 42.5 ( $\text{CH}_2$ ), 43.2 (CH), 127.3 (CH), 128.5 (CH), 128.7 (CH), 134.4 (CH), 137.5 (C), 163.2 (CH), 207.1 (CO); HRMS (CI) calcd. for  $\text{C}_{12}\text{H}_{13}\text{OS}$  ( $\text{MH}^+$ ) requires 205.06873; found 205.06852;  $[\alpha]_{\text{D}} = -163$  ( $c = 0.1$ ,  $\text{CHCl}_3$ ); HPLC analysis (ASH) isocratic heptane-EtOH; 50:50, (0.5 mL/min):  $t_{\text{r}}$  (*S*): 17.0 min; 84% e.e. Further elution gave (–)-**4a** as a white solid (1.085 g, 47%),  $[\alpha]_{\text{D}} = -56$  ( $c = 0.4$ ,  $\text{CHCl}_3$ ), with additional data in accord to that reported.<sup>2</sup>

**(*R*)-4-(Benzylthio)cyclopent-2-enone (+)-6a:**

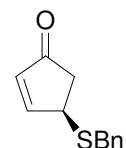

To (3*R*,4*S*)-3-(benzylthio)-4-hydroxycyclopentanone (–)-**4a** (1.022 g, 4.6 mmol, 1.0 equiv.) dissolved in acetic anhydride (15 mL), pyridine (0.78 mL, 9.7 mmol, 2.1 equiv.) was added dropwise and the reaction stirred for 5 h. The solvent was evaporated under reduced pressure and residue purified by column chromatography (cyclohexane-EtOAc, 8:1) to afford the title compound (+)-**6a** (0.865 g, 92%) as a colourless oil.  $[\alpha]_{\text{D}} = +171$  ( $c = 0.1$ ,  $\text{CHCl}_3$ ), with spectroscopic data as above. HPLC analysis (ASH) isocratic heptane-EtOH; 50:50, (0.5 mL/min):  $t_{\text{r}}$  (*R*): 15.0 min; 77% e.e.



## Synthesis of (+)- and (-)-12

### (3*S*,4*S*)-3-(Benzylthio)-4-butylcyclopentanone (+)-10:

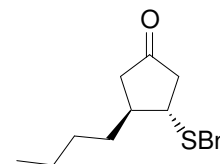

To CuI (19.0 mg, 0.10 mmol, 0.1 equiv.) in diethyl ether (5 mL) under nitrogen at  $-78\text{ }^{\circ}\text{C}$ , 2 M butylmagnesium chloride in diethyl ether (1.47 mL, 2.94 mmol, 3.0 equiv.) was added dropwise. The reaction was stirred at  $-78\text{ }^{\circ}\text{C}$  for 1 h. Then (–)-**6a** (200 mg, 0.98 mmol, 1 equiv.) dissolved in diethyl ether (10 mL) was added drop wise and was stirring maintained at  $-78\text{ }^{\circ}\text{C}$  for 2 h. 1 M HCl (10 mL) and diethyl ether (10 mL) were added and the resultant aqueous layer was further extracted with diethyl ether (2 x 10 mL). The combined organic layers were dried over  $\text{MgSO}_4$ , filtered and the solvent removed under reduced pressure. Purification by flash column chromatography (cyclohexane-EtOAc; 20:1) afforded the title compound (+)-**10** (164 mg, 64%) as a yellow oil.  $R_f$  = 0.7 (cyclohexane-EtOAc; 2:1);  $\nu_{\text{max}}$  (neat/ $\text{cm}^{-1}$ ) 3062, 3029, 2957, 2857, 1746, 1602, 1495, 1454, 1401, 1289, 1239, 1192, 1156, 1071, 1029, 916, 805, 769, 702, 669;  $\delta_{\text{H}}$  (400 MHz,  $\text{CDCl}_3$ ) 0.89 (3H, t,  $J$  = 7.0 Hz,  $\text{CH}_3$ ), 1.13-1.43 (5H, m,  $\text{CH}_2$ ), 1.69-1.78 (1H, m,  $\text{CH}_2$ ), 1.86 (1H, ddd,  $J$  = 1.0, 9.0, 18.5 Hz,  $\text{CH}_2$ ), 2.04-2.13 (1H, m, CH), 2.20 (1H, ddd,  $J$  = 1.0, 8.0, 19.0 Hz,  $\text{CH}_2$ ), 2.51-2.62 (2H, m, 2 x  $\text{CH}_2$ ), 2.87 (1H, dd,  $J$  = 8.0, 16.0 Hz, CH), 3.76 (1H, d,  $J$  = 13.5 Hz,  $\text{CH}_2$ ), 3.79 (1H, d,  $J$  = 13.5 Hz,  $\text{CH}_2$ ), 7.23-7.28 (1H, m, ArH), 7.30-7.34 (4H, m, ArH);  $\delta_{\text{C}}$  (100 MHz,  $\text{CDCl}_3$ ) 13.9 ( $\text{CH}_3$ ), 22.6 ( $\text{CH}_2$ ), 29.8 ( $\text{CH}_2$ ), 33.4 ( $\text{CH}_2$ ), 36.2 ( $\text{CH}_2$ ), 42.4 (CH), 44.0 ( $\text{CH}_2$ ), 45.5 (CH), 46.2 ( $\text{CH}_2$ ), 127.2 (CH), 128.6 (CH), 128.7 (CH), 138.0 (C), 216.1 (CO);  $[\alpha]_{\text{D}} = +54$  ( $c$  = 0.2,  $\text{CHCl}_3$ ).

### (*S*)-4-Butylcyclopent-2-enone (–)-12:

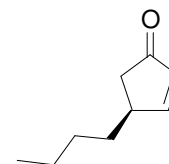

(3*S*,4*S*)-3-(Benzylthio)-4-butylcyclopentanone (+)-**10** (113 mg, 0.43 mmol, 1.0 equiv.) was dissolved in dichloromethane (10 mL) and brought to  $0\text{ }^{\circ}\text{C}$ , 77 % *m*-CPBA (202 mg, 0.90 mmol, 2.1 equiv.) was added and the reaction stirred for 1 h. Sodium thiosulfate solution (10 mL) was added and stirring maintained for 30 min. The resultant aqueous layer was extracted with dichloromethane (2 x 10 mL). The combined organic layers were dried over  $\text{MgSO}_4$ , filtered and

the solvent removed under reduced pressure which gave (+)-**11** (125 mg, 99%) as a brown oil { $R_f$  = 0.5 (cyclohexane-EtOAc; 2:1);  $[\alpha]_D = +50$  ( $c = 0.1$ ,  $\text{CHCl}_3$ )}. (+)-**11** (57.0 mg, 0.19 mmol, 1.00 equiv.) was dissolved in dichloromethane (5 mL) and cooled to 0 °C. Triethylamine (30  $\mu\text{L}$ , 0.20 mmol, 1.05 equiv.) was added and the reaction stirred for 1 h. Saturated  $\text{NH}_4\text{Cl}$  (5 mL) and dichloromethane (5 mL) were added and the resultant aqueous layer was further extracted with dichloromethane (2 x 5 mL). The combined organic layers were dried over  $\text{MgSO}_4$ , filtered and the solvent removed under reduced pressure. Purification by flash column chromatography (cyclohexane-EtOAc; 6:1) afforded the enone (–)-**12** (17.3 mg, 65%) as a yellow oil.  $R_f$  = 0.5 (cyclohexane-EtOAc; 2:1);  $\nu_{\text{max}}$  (neat/ $\text{cm}^{-1}$ ) 2958, 2927, 2858, 2250, 1713, 1586, 1505, 1491, 1466, 1446, 1407, 1379, 1350, 1250, 1185, 1097, 1080, 1038, 915, 833, 780, 732, 650;  $\delta_{\text{H}}$  (400 MHz,  $\text{CDCl}_3$ ) 0.91 (3H, t,  $J = 7.0$  Hz,  $\text{CH}_3$ ), 1.31-1.43 (5H, m,  $\text{CH}_2$ ), 1.55-1.61 (1H, m,  $\text{CH}_2$ ), 2.00 (1H, dd,  $J = 2.0, 19.0$  Hz,  $\text{CH}_2$ ), 2.53 (1H, dd,  $J = 6.5, 19.0$  Hz,  $\text{CH}_2$ ), 2.88-2.94 (1H, m, CH), 6.14 (1H, dd,  $J = 2.0, 5.5$  Hz, CH), 7.63 (1H, dd,  $J = 2.5, 5.5$  Hz, CH);  $\delta_{\text{C}}$  (100 MHz,  $\text{CDCl}_3$ ) 13.9 ( $\text{CH}_3$ ), 22.7 ( $\text{CH}_2$ ), 29.8 ( $\text{CH}_2$ ), 34.4 ( $\text{CH}_2$ ), 41.1 ( $\text{CH}_2$ ), 41.5 (CH), 133.6 (CH), 168.7 (CH), 210.1 (CO);  $[\alpha]_D = -120$  ( $c = 0.1$ ,  $\text{CHCl}_3$ ); {lit.  $[\alpha]_D = -160.8$  ( $c = 1.7$ ,  $\text{CHCl}_3$ ), 98% e.e.}.<sup>3</sup>

**(3*R*,4*R*)-3-(Benzylthio)-4-butylcyclopentanone (–)-10:**

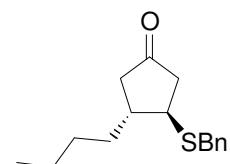

As described above,  $\text{CuI}$  (19.0 mg, 0.10 mmol, 0.1 equiv.) in diethyl ether (5 mL) was treated with a 2 M solution of butylmagnesium chloride in diethyl ether (1.47 mL, 2.94 mmol, 3.0 equiv.) was added dropwise. The reaction was stirred at –78 °C for 1 h before (+)-**6a** (200 mg, 0.98 mmol, 1.0 equiv.) in diethyl ether (10 mL) was added dropwise. After stirring at –78 °C for 2 h saturated  $\text{NH}_4\text{Cl}$  solution (10 mL) and diethyl ether (10 mL) were added. Work up and purification by flash column chromatography as described afforded (–)-**10** (161 mg, 63%) as a yellow oil.  $[\alpha]_D = -57$  ( $c = 0.1$ ,  $\text{CHCl}_3$ ).

**(*R*)-4-Butylcyclopent-2-enone (+)-12:**

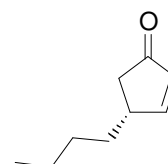

As described above, (–)-**10** (111 mg, 0.42 mmol, 1.0 equiv.) was dissolved in dichloromethane (10 mL) and brought to 0 °C, 77 % *m*-CPBA (199 mg, 0.89 mmol, 2.1 equiv.) was added and the reaction stirred for 1 h. Saturated sodium thiosulfate solution (10 mL) was added and stirring maintained for 30 min. The resultant aqueous layer was extracted with dichloromethane (2 x 10 mL). The combined organic layers were dried over MgSO<sub>4</sub>, filtered and the solvent removed under reduced pressure. Thus, (–)-**11** (120 mg, 97%) was collected as a brown oil and used subsequently without additional purification {[α]<sub>D</sub> = -56 (*c* = 0.1, CHCl<sub>3</sub>)}. (–)-**9** (106 mg, 0.36 mmol, 1.00 equiv.) was dissolved in dichloromethane (10 mL) and brought to 0 °C. Triethylamine (50 μL, 0.38 mmol, 1.05 equiv.) was added and the reaction stirred for 1 h. Saturated NH<sub>4</sub>Cl (10 mL) and dichloromethane (10 mL) were added and the resultant aqueous layer was further extracted with dichloromethane (2 x 10 mL). The combined organic layers were dried over MgSO<sub>4</sub>, filtered and the solvent removed under reduced pressure. Purification by flash column chromatography (cyclohexane-EtOAc; 6:1) afforded (+)-**12** (31 mg, 62%) as a yellow oil. [α]<sub>D</sub> = +121 (*c* = 0.1, CHCl<sub>3</sub>).

### Synthesis of 3,4-Dimethoxybenzyl thiol **8**

#### 3,4-Dimethoxybenzylalcohol:<sup>4</sup>

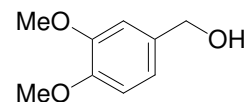

3-4-Dimethoxybenzaldehyde **7** (10.00 g, 60.2 mmol, 1 equiv.) was dissolved in MeOH (300 mL) and cooled to 0 °C. NaBH<sub>4</sub> (2.73 g, 72.2 mmol, 1.2 equiv.) was added portionwise and the reaction stirred for 20 min. The reaction was quenched with 1 M HCl (10 mL) until a neutral pH was reached. The solvent was removed under reduced pressure and the residue was extracted with dichloromethane (3 x 50 mL). The combined organic layers were dried over MgSO<sub>4</sub>, filtered and the solvent removed under reduced pressure to yield the *title compound* (9.88 g, 98%) as a clear oil. *R*<sub>f</sub> = 0.3 (cyclohexane-EtOAc; 1:1); ν<sub>max</sub> (neat/cm<sup>-1</sup>) 3495, 3002, 2938, 2874, 2837, 1594, 1518, 1465, 1420, 1262, 1237, 1138, 1027, 919, 858, 810, 765, 741, 642, 553; δ<sub>H</sub> (400 MHz, CDCl<sub>3</sub>) 2.50 (1H, s, OH), 3.80 (6H, s(br), CH<sub>3</sub>), 4.52 (2H, s, CH<sub>2</sub>), 6.76-6.82 (3H, m, ArH); δ<sub>C</sub> (100 MHz, CDCl<sub>3</sub>) 55.6 (CH<sub>3</sub>), 55.7 (CH<sub>3</sub>), 64.8 (CH<sub>2</sub>), 110.4 (CH), 111.0 (CH), 119.2 (CH), 133.6 (C), 148.3 (C), 148.9 (C).

### 3-4-Dimethoxybenzyl chloride:<sup>5</sup>

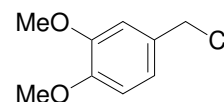

3-4-Dimethoxybenzylalcohol (9.86 g, 58.6 mmol, 1 equiv.) was dissolved in dichloromethane (300 mL) and cooled to 0 °C. Thionyl chloride (8.52 mL, 117.0 mmol, 2 equiv.) was added dropwise followed by dropwise addition of pyridine (4.72 mL, 58.6 mmol, 1 equiv.). The reaction was stirred for 20 min before water (300 mL) was added. The resultant aqueous layer was extracted with dichloromethane (3 x 100 mL) and the combined organic layers were dried over MgSO<sub>4</sub>. Filtration and the solvent removed under reduced pressure gave the *title compound* (10.83 g, 99%) as a white solid, M.p. = 50-52 °C.  $R_f$  = 0.8 (cyclohexane-EtOAc; 1:1);  $\nu_{\max}$  (neat/cm<sup>-1</sup>) 3002, 2958, 2836, 1607, 1516, 1464, 1419, 1344, 1263, 1238, 1160, 1138, 1099, 1027, 855, 810, 766, 723, 691, 601, 547;  $\delta_H$  (500 MHz, CDCl<sub>3</sub>) 3.88 (3H, s, CH<sub>3</sub>), 3.90 (3H, s, CH<sub>3</sub>), 4.57 (2H, s, CH<sub>2</sub>), 6.82 (1H, d,  $J$  = 8.0 Hz, ArH), 6.92-6.94 (2H, m, ArH);  $\delta_C$  (75 MHz, CDCl<sub>3</sub>) 46.7 (CH<sub>2</sub>), 55.9 (CH<sub>3</sub>), 55.9 (CH<sub>3</sub>), 111.0 (CH), 111.7 (CH), 121.1 (CH), 130.0 (C), 149.1 (C), 149.2 (C).

### 3,4-Dimethoxybenzyl ethanethioate:

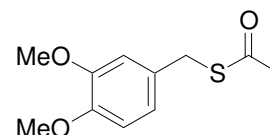

3-4-Dimethoxybenzyl chloride (10.94 g, 58.6 mmol, 1 equiv.) was dissolved in DMF (150 mL). To this potassium thioacetate (8.03 g, 70.3 mmol, 1.2 equiv.) was added and the reaction was stirred overnight. Water (200 mL) was added and the mixture was extracted with diethyl ether (4 x 100 mL). The combined organic layers were dried over MgSO<sub>4</sub>, filtered and the solvent removed under reduced pressure. Purification by flash column chromatography (cyclohexane-EtOAc; 4:1) afforded the *title compound* (12.60 g, 95%) as a white solid, M.p. = 32-33 °C.  $R_f$  = 0.3 (cyclohexane-EtOAc; 4:1);  $\nu_{\max}$  (neat/cm<sup>-1</sup>) 3000, 2936, 2835, 1689, 1592, 1515, 1465, 1420, 1265, 1231, 1138, 1028, 959, 910, 863, 733, 632, 473;  $\delta_H$  (400 MHz, CDCl<sub>3</sub>) 2.33 (3H, s, CH<sub>3</sub>), 3.84 (3H, s, CH<sub>3</sub>), 3.86 (3H, s, CH<sub>3</sub>), 4.08 (2H, s, CH<sub>2</sub>), 6.76-6.85 (3H, m, ArH);  $\delta_C$  (100 MHz, CDCl<sub>3</sub>) 30.3 (CH<sub>3</sub>), 33.4 (CH<sub>2</sub>), 55.8 (CH<sub>3</sub>), 55.9 (CH<sub>3</sub>), 111.2 (CH), 112.0 (CH), 121.0 (CH), 130.1 (C), 148.4 (C), 149.0 (C), 195.2 (CO); Anal. Calcd for C<sub>11</sub>H<sub>14</sub>O<sub>3</sub>S: C, 58.38; H, 6.24; S, 14.17. Found: C, 58.23; H, 6.22; S, 14.54.

### 3,4-Dimethoxybenzyl thiol **8**:<sup>6</sup>

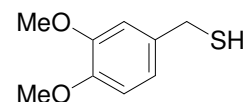

3,4-Dimethoxybenzyl ethanethioate (3.07 g, 13.6 mmol, 1 equiv.) was dissolved in EtOH (100 mL) and cooled to 0 °C. NaBH<sub>4</sub> (0.92 g, 24.4 mmol, 1.8 equiv.) was added portionwise. After 6 h the reaction was quenched with 1 M HCl solution (8 mL) until a neutral pH was reached. EtOH was partially removed under reduced pressure and the residue was extracted with dichloromethane (3 x 30 mL). The combined organic layers were dried over MgSO<sub>4</sub>, filtered and the solvent removed under reduced pressure. Purification by flash column chromatography (cyclohexane-EtOAc; 4:1) afforded **8** (2.08 g, 83%) as a clear oil. *R*<sub>f</sub> = 0.3 (cyclohexane-EtOAc; 4:1); *v*<sub>max</sub> (neat/cm<sup>-1</sup>) 2999, 2934, 2834, 2560, 1591, 1514, 1463, 1417, 1334, 1262, 1233, 1138, 1027, 913, 854, 810, 764, 730, 609, 542; *δ*<sub>H</sub> (400 MHz, CDCl<sub>3</sub>) 1.75 (1H, t, *J* = 7.5 Hz, SH), 3.71 (2H, d, *J* = 7.5 Hz, CH<sub>2</sub>), 3.86 (3H, s, CH<sub>3</sub>), 3.88 (3H, s, CH<sub>3</sub>), 6.78-6.86 (3H, m, ArH); *δ*<sub>C</sub> (100 MHz, CDCl<sub>3</sub>) 28.8 (CH<sub>2</sub>), 55.8 (CH<sub>3</sub>), 55.9 (CH<sub>3</sub>), 111.2 (CH), 111.3 (CH), 120.0 (CH), 133.6 (C), 148.1 (C), 149.1 (C).

### Synthesis of (+)- and (-)-**6b**

#### 3-(3,4-Dimethoxybenzylthio)-4-hydroxycyclopentanone (±)-**4b**:

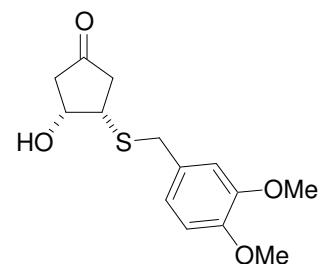

(±)-4-Hydroxycyclopent-2-enone **1** (0.643 g, 6.6 mmol, 1 equiv.) and 3,4-dimethoxybenzyl thiol **8** (1.21 g, 6.6 mmol, 1 equiv.) were dissolved in dichloromethane (70 mL). Triethylamine (90 μL, 0.66 mmol, 0.1 equiv.) was added dropwise and the reaction was stirred for 2 h. The solvent was removed under reduced pressure and the residue purified by column chromatography (cyclohexane-EtOAc, 4:1) to afford the title compound (±)-**4b** (1.61 g, 86%) as a white solid; M.p. = 60-62 °C. *R*<sub>f</sub> = 0.1 (cyclohexane-EtOAc; 4:1); *v*<sub>max</sub> (neat/cm<sup>-1</sup>) 3448, 3058, 3029, 2951, 2867, 1747, 1686, 1515, 1454, 1396, 1331, 1265, 1153, 1009, 909, 735, 650, 475; *δ*<sub>H</sub> (400 MHz, CDCl<sub>3</sub>) 2.21 (1H, dd, *J* = 12.0, 18.5 Hz, CH<sub>2</sub>), 2.29 (1H, dd, *J* = 4.5, 18.5 Hz, CH<sub>2</sub>), 2.42 (1H, dd, *J* = 8.0, 18.5 Hz, CH<sub>2</sub>), 2.54 (1H, d, *J* = 18.5 Hz, CH<sub>2</sub>), 2.75 (1H, s, OH), 3.30 (1H, ddd, *J* = 3.5, 8.0, 12.0 Hz, CH), 3.74

(1H, d,  $J = 13.5$  Hz, CH<sub>2</sub>), 3.80 (1H, d,  $J = 13.5$  Hz, CH<sub>2</sub>), 3.88 (3H, s, CH<sub>3</sub>), 3.90 (3H, s, CH<sub>3</sub>), 4.19-4.21 (1H, m, CH), 6.80-6.87 (2H, m, ArH), 6.91 (1H, d,  $J = 1.5$  Hz, ArH);  $\delta_C$  (125 MHz, CDCl<sub>3</sub>) 35.3 (CH<sub>2</sub>), 40.3 (CH<sub>2</sub>), 46.5 (CH<sub>2</sub>), 47.0 (CH), 55.9 (CH<sub>3</sub>), 56.0 (CH<sub>3</sub>), 68.0 (CH), 111.1 (CH), 111.6 (CH), 120.8 (CH), 129.8 (C), 148.6 (C), 149.4 (C), 213.4 (CO). Anal. Calcd for C<sub>14</sub>H<sub>18</sub>O<sub>4</sub>S: C, 59.55; H, 6.43; S, 11.36. Found: C, 59.38; H, 6.38; S, 11.82.

**(S)-4-(3,4-Dimethoxybenzylthio)cyclopent-2-enone (-)-6b** and **(3R,4S)-3-(3,4-dimethoxybenzylthio)-4-hydroxycyclopentanone (-)-4b**:

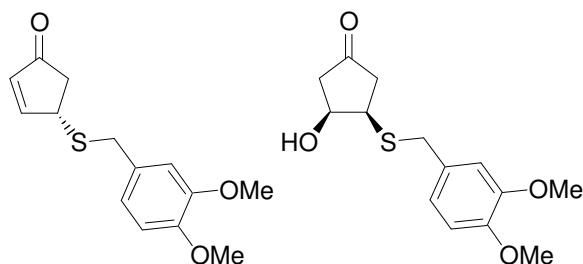

To *cis*-(±)-**4b** (300 mg, 1.06 mmol, 1 equiv.) dissolved in diisopropyl ether (50 mL), vinyl acetate (0.49 mL, 5.31 mmol, 5 equiv.) and *Candida antarctica* Lipase B [300 mg, 1:1 w/w (enzyme:substrate)] were added. The reaction was stirred for 16 h. The mixture was filtered, and the enzyme residue washed with diisopropyl ether (2 × 30 mL). The solvent was removed under reduced pressure and the residue was dissolved in THF (50 mL) and cooled to 0°C. Triethylamine (0.15 mL, 1.08 mmol, 1.0 equiv.) was added dropwise and the reaction stirred for 1 h. The solvent was removed under reduced pressure and the residue purified by column chromatography (cyclohexane-EtOAc, 4:1) to afford (-)-**6b** (129 mg, 46%) as a colourless oil.  $R_f = 0.1$  (cyclohexane-EtOAc, 4:1);  $\nu_{\max}$  (neat/cm<sup>-1</sup>) 3060, 3002, 2935, 2836, 1715, 1589, 1515, 1464, 1420, 1341, 1265, 1244, 1139, 1026, 939, 855, 733, 548;  $\delta_H$  (400 MHz, CDCl<sub>3</sub>) 2.32 (1H, dd,  $J = 2.0$ , 19.0 Hz, CH<sub>2</sub>), 2.74 (1H, dd,  $J = 6.5$ , 19.0 Hz, CH<sub>2</sub>), 3.72 (1H, d,  $J = 13.5$  Hz, CH<sub>2</sub>), 3.77 (1H, d,  $J = 13.5$  Hz, CH<sub>2</sub>), 3.87 (3H, s, CH<sub>3</sub>), 3.89 (3H, s, CH<sub>3</sub>), 3.90-3.93 (1H, m, CH), 6.18 (1H, dd,  $J = 2.0$ , 5.5 Hz, CH), 6.78-7.83 (2H, m, ArH), 6.87 (1H, d,  $J = 1.0$  Hz, ArH), 7.46 (1H, dd,  $J = 2.5$ , 5.5 Hz, CH);  $\delta_C$  (100 MHz, CDCl<sub>3</sub>) 35.5 (CH<sub>2</sub>), 42.6 (CH<sub>2</sub>), 43.3 (CH), 55.9 (2 × CH<sub>3</sub>), 111.1 (CH), 111.9 (CH), 121.1 (CH), 129.9 (C), 134.4 (CH), 148.5 (C), 149.3 (C), 163.3 (CH), 207.2 (CO); HRMS (EI) calcd. for C<sub>14</sub>H<sub>16</sub>O<sub>3</sub>S (M<sup>+</sup>) requires 264.0820; found 264.0818;  $[\alpha]_D = -97$  ( $c = 0.1$ , CHCl<sub>3</sub>); HPLC analysis (ASH) isocratic heptane-EtOH; 50:50, (0.6 mL/min):  $t_r$  (S): 19.5 min, 85% e.e. Further elution gave (-)-**4b** as a white solid (140 mg, 47%);  $[\alpha]_D = -36$  ( $c = 1.0$ , CHCl<sub>3</sub>) with data in accord with that reported above. Recrystallisation from dichloromethane gave crystals suitable for X-ray crystallographic analysis.

**(*R*)-4-(3,4-Dimethoxybenzylthio)cyclopent-2-enone (+)-6b:**

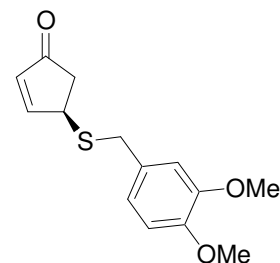

To (–)-**4b** (121 mg, 0.43 mmol, 1 equiv.) dissolved in acetic anhydride (2 mL), pyridine (35  $\mu$ L, 0.43 mmol, 1 equiv.) and triethylamine (60  $\mu$ L, 0.43 mmol, 1 equiv.) were added dropwise and the reaction stirred for 1 h. The solvent was evaporated under reduced pressure and residue purified by column chromatography (cyclohexane-EtOAc, 3:1) to afford (+)-**6b** (98 mg, 87%) as a colourless oil;  $[\alpha]_D = +95$  ( $c = 0.1$ ,  $\text{CHCl}_3$ ); HPLC analysis (ASH) isocratic heptane-EtOH; 50:50, (0.6 mL/min):  $t_r$  (*R*): 17.0 min, 85% e.e. Where additional data was as reported above.

**Synthesis of ( $\pm$ )-4-Hydroxycyclohex-2-enone 15**

**1-Methoxycyclohexa-1,4-diene:<sup>7</sup>**

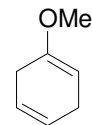

Under nitrogen anisole (21.00 mL, 0.19 mol, 1.0 equiv.) was dissolved in THF (50 mL) and *t*-BuOH (80 mL) and cooled to  $-78^\circ\text{C}$ . Liquid ammonia (500 mL approx.) was then introduced. Lithium metal (3.68 g, 0.53 mol, 2.7 equiv.) was added in portions to the mixture. Stirring was continued for 1 h at  $-33^\circ\text{C}$ . MeOH (approx. 20 mL) was added until the blue colour disappeared. Water (60 mL) was then gradually added and the reaction allowed warm to room temperature overnight. Extraction was performed with diethyl ether (3 x 80 mL) and the combined organic extracts were washed with water (4 x 50 mL), dried over  $\text{MgSO}_4$  and the solvent removed under reduced pressure. Thus, the product (19.89 g, 94%) was obtained as a colourless oil.  $\delta_{\text{H}}$  (300 MHz,  $\text{CDCl}_3$ ) 2.68-2.73 (2H, m,  $\text{CH}_2$ ), 2.76-2.84 (2H, m,  $\text{CH}_2$ ), 3.54 (3H, s,  $\text{CH}_3$ ), 4.60-4.63 (1H, m, CH), 5.68-5.72 (2H, m, CH).

### Cyclohex-3-enone:<sup>8</sup>

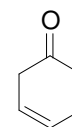

1-Methoxycyclohexa-1,4-diene (19.80 g, 0.18 mol, 1 equiv.) was dissolved in  $\text{CHCl}_3$  (100 mL) and  $\text{H}_2\text{O}$  (200 mL). To this solution perchloric acid (0.2 mL, 3.3 mmol, 0.02 equiv.) was added and the reaction was stirred overnight. The mixture was concentrated *in vacuo* then re-suspended in  $\text{Et}_2\text{O}$  (100 mL) and sat. NaCl (100 mL). The biphasic mixture was separated and the organic layer washed with  $\text{H}_2\text{O}$  (80 mL), dried over  $\text{MgSO}_4$ , filtered and concentrated *in vacuo*. The residue was purified by column chromatography (*n*-hexane-EtOAc, 19:1), to give the *title compound* (15.09 g, 87%) as a colourless oil.  $R_f = 0.30$  (*n*-hexane-EtOAc, 19:1);  $\nu_{\text{max}}$  (neat,  $\text{cm}^{-1}$ ) 3037, 2972, 1720;  $\delta_{\text{H}}$  (300 MHz,  $\text{CDCl}_3$ ) 2.47-2.52 (4H, m,  $\text{CH}_2$ ), 2.86-2.90 (2H, m,  $\text{CH}_2$ ), 5.72-5.78 (1H, m, CH), 5.88-5.91 (1H, m, CH);  $^{13}\text{C}$  NMR (100 MHz,  $\text{CDCl}_3$ ) 26.0 ( $\text{CH}_2$ ), 39.2 ( $\text{CH}_2$ ), 40.3 ( $\text{CH}_2$ ), 124.7 (CH), 127.4 (CH), 210.4 (CO); HRMS calcd for:  $\text{C}_6\text{H}_{12}\text{ONS}$  (CI,  $\text{MNH}_4^+$ ) requires 114.09190: found 114.09225.

### 4-Hydroxycyclohex-2-enone:<sup>8</sup>

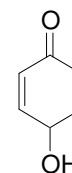

Cyclohex-3-enone (17.30 g, 0.18 mol, 1.0 equiv.) was dissolved in  $\text{CH}_2\text{Cl}_2$  (200 mL) and *m*-CPBA 77% (44.37 g, 0.20 mol, 1.1 equiv.) was added over 30 min. The reaction was stirred overnight and sat. sodium bicarbonate solution (100 mL) and sat. sodium thiosulfate solution (100 mL) were added and the reaction stirred for 30 min. The layers were separated and the resulting aqueous layer was extracted with dichloromethane (2 x 80 mL). The combined organic layers were dried over  $\text{MgSO}_4$ , filtered and the solvent removed under reduced pressure to afford crude epoxide which was dissolved in MeOH- $\text{Et}_2\text{O}$  (1:1) (200 mL). To this basic  $\text{Al}_2\text{O}_3$  (20 g) was added and the resultant slurry was stirred at room temperature for 2 h. The mixture was filtered and the solid washed with MeOH- $\text{Et}_2\text{O}$  (1:1) (100 mL). The filtrate was then concentrated under reduced pressure to dryness and the residue purified by column chromatography (cyclohexane-EtOAc; 1:1) to give the *title compound* (12.77 g, 63%) as a clear oil.  $R_f = 0.1$  (cyclohexane-EtOAc; 4:1);  $\nu_{\text{max}}$  (neat/ $\text{cm}^{-1}$ ) 3396, 2957, 1698, 1417, 1378, 1132, 1065, 970, 943, 862;  $\delta_{\text{H}}$  (400 MHz,  $\text{CDCl}_3$ ) 1.96-2.07 (1H, m,  $\text{CH}_2$ ),



2.32-2.44 (2H, m, CH<sub>2</sub>), 2.54-2.63 (1H, m, CH<sub>2</sub>), 4.55-4.62 (1H, m, CH-OH), 5.97 (1H, d, *J* = 10.0 Hz, CH), 6.91-3.95 (1H, m, CH);  $\delta_C$  (100 MHz, CDCl<sub>3</sub>) 32.9 (CH<sub>2</sub>), 35.7 (CH<sub>2</sub>), 66.7 (CH), 129.7 (CH), 152.8 (CH), 198.9 (CO); HRMS calcd for: C<sub>6</sub>H<sub>12</sub>O<sub>2</sub>N (Cl, MNH<sub>4</sub><sup>+</sup>) requires 130.08681: found 130.08660.

### Reduction of (±)-4-(*tert*-Butyldimethylsilyloxy)cyclohex-2-enone **19**

*cis*-4-(*tert*-Butyldimethylsilyloxy)cyclohex-2-enol (±)-*cis*-**20** and *trans*-4-(*tert*-butyldimethylsilyloxy)cyclohex-2-enol (±)-*trans*-**20**:<sup>9,10</sup>

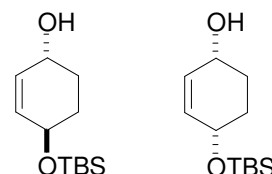

LiAlH<sub>4</sub> (10 mg, 0.26 mmol, 1 equiv.) was added to THF (5 mL) and cooled to 0 °C. To this (±)-**19** (58 mg, 0.26 mmol, 1 equiv.) in THF (5 mL) was added dropwise and the reaction stirred at this temperature for 20 min. 0.1 M HCl (10 mL) was added and the resulting aqueous layer was extracted with dichloromethane (3 x 10 mL). The combined organic layers were dried over MgSO<sub>4</sub>, filtered and the solvent removed under reduced pressure. Purification by flash column chromatography (cyclohexane-EtOAc; 30:1) afforded (±)-*cis*-**20** (24 mg, 41%) as a clear oil. *R*<sub>f</sub> = 0.65 (cyclohexane-EtOAc; 1:1);  $\delta_H$  (400 MHz, CDCl<sub>3</sub>) 0.08 (6H, s, 2 x CH<sub>3</sub>), 0.90 (9H, s, CH<sub>3</sub>), 1.70-1.74 (2H, m, CH<sub>2</sub>), 1.76-1.83 (2H, m, CH<sub>2</sub>), 4.07-4.12 (1H, m, CH-OTBS), 4.13-4.16 (1H, m, CH), 5.74 (1H, dd, *J* = 2.0, 10.0 Hz, CH), 5.80 (1H, dd, *J* = 3.0, 10.0 Hz, CH);  $\delta_C$  (100 MHz, CDCl<sub>3</sub>) -4.7 (CH<sub>3</sub>), -4.6 (CH<sub>3</sub>), 18.2 (C), 25.9 (3 x CH<sub>3</sub>), 28.2 (CH<sub>2</sub>), 28.5 (CH<sub>2</sub>), 64.9 (CH), 66.3 (CH), 130.5 (CH), 134.3 (CH). Further elution gave (±)-*trans*-**20** (23 mg, 39%) as a clear oil *R*<sub>f</sub> = 0.60 (cyclohexane-EtOAc; 1:1);  $\delta_H$  (400 MHz, CDCl<sub>3</sub>) 0.07 (3H, s, CH<sub>3</sub>), 0.08 (3H, s, CH<sub>3</sub>), 0.89 (9H, s, CH<sub>3</sub>), 1.39-1.59 (2H, m, CH<sub>2</sub>), 1.97-2.03 (1H, m, CH<sub>2</sub>), 2.10-2.17 (1H, m, CH<sub>2</sub>), 4.24-4.28 (2H, m, 2 x CH), 5.70 (1H, d, *J* = 10.5 Hz, CH), 5.73 (1H, d, *J* = 10.5 Hz, CH);  $\delta_C$  (100 MHz, CDCl<sub>3</sub>) -4.7 (CH<sub>3</sub>), -4.6 (CH<sub>3</sub>), 18.2 (C), 25.9 (CH<sub>3</sub>), 30.9 (CH<sub>2</sub>), 31.0 (CH<sub>2</sub>), 66.6 (CH), 67.0 (CH), 131.7 (CH), 133.8 (CH).

*cis*-4-(*tert*-Butyldimethylsilyloxy)cyclohex-2-enyl acetate:<sup>10</sup>

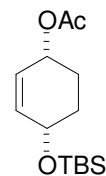

(±)-*cis*-**20** (30 mg, 0.13 mmol, 1 equiv.) was dissolved in acetic anhydride (1 mL), to this pyridine (20 µL, 0.26 mmol, 2 equiv.) was added. The reaction was stirred for 7 h and the solvent was removed under reduced pressure to give the *title compound* (35 mg, 99%) as a clear oil.  $R_f$  = 0.7 (cyclohexane-EtOAc; 1:1);  $\delta_H$  (400 MHz, CDCl<sub>3</sub>) 0.07 (3H, s, CH<sub>3</sub>), 0.08 (3H, s, CH<sub>3</sub>), 0.89 (9H, s, CH<sub>3</sub>), 1.71-1.83 (3H, m, CH<sub>2</sub>), 1.85-1.91 (1H, m, CH<sub>2</sub>), 2.03 (3H, s, CH<sub>3</sub>), 4.14-4.19 (1H, m, CH), 5.15 (1H, ddd, app. q,  $J$  = 4.0 Hz, CH), 5.73 (1H, dd,  $J$  = 3.5, 10.0 Hz, CH), 5.86 (1H, dd,  $J$  = 2.0, 10.0 Hz, CH);  $\delta_C$  (100 MHz, CDCl<sub>3</sub>) -4.7 (CH<sub>3</sub>), -4.6 (CH<sub>3</sub>), 18.2 (C), 21.3 (CH<sub>3</sub>), 25.4 (CH<sub>2</sub>), 25.8 (CH<sub>3</sub>), 28.4 (CH<sub>2</sub>), 66.3 (CH), 67.0 (CH), 126.2 (CH), 136.4 (CH), 170.8 (CO).

***cis*-4-Hydroxycyclohex-2-enyl acetate **21**:**<sup>11</sup>

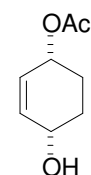

(±)-*cis*-**20** (28 mg, 0.10 mmol, 1 equiv.) was dissolved in THF (2 mL), to this a 1.0 M solution of TBAF in THF (0.21 mL, 0.21 mmol, 2 equiv.) was added and the reaction stirred overnight. The solvent was removed under reduced pressure and the crude product was purified by flash column chromatography (pentane-EtOAc; 1:1) to afford the title compound (±)-*cis*-**21** (12 mg, 74%) as a clear oil.  $R_f$  = 0.3 (cyclohexane-EtOAc; 1:1);  $\delta_H$  (400 MHz, CDCl<sub>3</sub>) 1.71-1.79 (1H, m, CH<sub>2</sub>), 1.82-1.87 (2H, m, CH<sub>2</sub>), 1.89-1.94 (1H, m, CH<sub>2</sub>), 2.06 (3H, s, CH<sub>3</sub>), 4.15-4.22 (1H, m, CH), 5.19 (1H, ddd, app. q,  $J$  = 4.0, CH), 5.80 (1H, dd,  $J$  = 3.5, 10.0 Hz, CH), 5.97 (1H, dd,  $J$  = 2.5, 10.0 Hz, CH);  $\delta_C$  (100 MHz, CDCl<sub>3</sub>) 21.3 (CH<sub>3</sub>), 24.9 (CH<sub>2</sub>), 28.2 (CH<sub>2</sub>), 65.4 (CH), 67.2 (CH), 128.0 (CH), 134.7 (CH), 170.7 (CO).

**4-(Acetoxy)cyclohex-2-enone (±)-**18**:**<sup>12</sup>

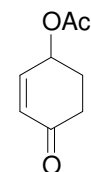

Under nitrogen (±)-*cis*-**21** (10 mg, 0.064 mmol, 1 equiv.) was dissolved in dry dichloromethane (2 mL). Dess-Martin periodinane (33 mg, 0.077 mmol, 1.2 equiv.) was added and the reaction stirred for 30 mins. Sat. sodium bicarbonate solution (3 mL) and sat. sodium thiosulfate solution (3 mL) were added and the reaction stirred for 20 min. The layers were separated and the resulting aqueous layer was extracted with dichloromethane (2 x 5 mL). The combined organic layers were dried over

MgSO<sub>4</sub>, filtered and the solvent removed under reduced pressure to afford the title compound (±)-**18** (8 mg, 81 %) as a clear oil. *R*<sub>f</sub> = 0.35 (pentane-EtOAc; 3:1); *v*<sub>max</sub> (neat/cm<sup>-1</sup>) 1741, 1686, 1372, 1236, 1037; *δ*<sub>H</sub> (400 MHz, CDCl<sub>3</sub>) 1.99-2.20 (1H, m, CH<sub>2</sub>), 2.12 (3H, s, CH<sub>3</sub>), 2.28-2.70 (3H, m, CH<sub>2</sub>), 5.55-5.58 (1H, m, CH), 6.06 (1H, ddd, *J* = 1.0, 1.5, 10.0 Hz, CH), 6.84 (1H, ddd, *J* = 1.5, 2.5, 10.0 Hz, CH); *δ*<sub>C</sub> (100 MHz, CDCl<sub>3</sub>) 21.0 (CH<sub>3</sub>), 28.7 (CH<sub>2</sub>), 35.0 (CH<sub>2</sub>), 67.7 (CH), 130.8 (CH), 147.6 (CH), 170.3 (CO); HRMS (CI) cald. for C<sub>8</sub>H<sub>14</sub>O<sub>3</sub>N (MNH<sub>4</sub><sup>+</sup>) requires 173.08459; found 173.08510.

### Cope-type sulfoxide elimination for conversion of (–)-**17** to (–)-**19**

#### (1*R*,2*S*,4*S*)-2-(3,4-Dimethoxybenzylthio)-4-hydroxycyclohexyl acetate (–)-**22**:

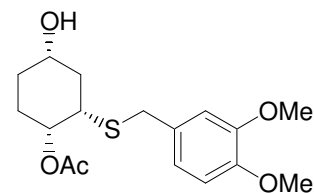

Compound (–)-**17** (2.53 g, 7.48 mmol, 1.0 equiv.) was dissolved in EtOH (80 mL), to this NaBH<sub>4</sub> (283 mg, 7.48 mmol, 1.0 equiv.) was added portion wise over 5 min. The reaction was stirred for 20 min. TLC analysis indicated consumption of starting material. The reaction was quenched with 1M HCl (10 mL approx.) until a neutral pH was reached. The solvent was removed under reduced pressure and the residue was extracted with dichloromethane (3 x 50 mL). The combined organic layers were dried over MgSO<sub>4</sub>, filtered and the solvent removed under reduced pressure. Purification by flash column chromatography (cyclohexane-EtOAc; 1:1) afforded the title compound (–)-**22** (2.44 g, 96%) as a clear oil. *R*<sub>f</sub> = 0.1 (cyclohexane-EtOAc; 1:1); *v*<sub>max</sub> (neat/cm<sup>-1</sup>) 3487, 2991, 2941, 2861, 1733, 1573, 1513, 1457, 1372, 1336, 1256, 1145, 1103, 1028, 965; *δ*<sub>H</sub> (400 MHz, CDCl<sub>3</sub>) 1.37-1.82 (4H, m, CH<sub>2</sub>), 1.94-2.06 (2H, m, CH<sub>2</sub>), 2.12 (3H, s, CH<sub>3</sub>), 2.63 (1H, ddd, *J* = 3.0, 3.5, 12.5 Hz, CH), 3.57-3.66 (1H, m, CH), 3.69 (1H, d, *J* = 13.5 Hz, CH<sub>2</sub>), 3.74 (1H, d, *J* = 13.5 Hz, CH<sub>2</sub>), 3.86 (3H, s, CH<sub>3</sub>), 3.88 (3H, s, CH<sub>3</sub>), 5.06-5.17 (1H, m, CH), 6.77 (1H, d, *J* = 8.0 Hz, ArH), 6.82 (1H, dd, *J* = 2.0, 8.0 Hz, ArH), 6.88 (1H, d, *J* = 2.0 Hz, ArH); *δ*<sub>C</sub> (100 MHz, CDCl<sub>3</sub>) 21.1 (CH<sub>3</sub>), 27.7 (CH<sub>2</sub>), 29.3 (CH<sub>2</sub>), 35.1 (CH<sub>2</sub>), 36.6 (CH<sub>2</sub>), 43.4 (CH), 55.9 (CH<sub>3</sub>), 56.0 (CH<sub>3</sub>), 68.3 (CH), 69.4 (CH), 110.9 (CH), 111.8 (CH), 121.0 (CH), 130.2 (C), 148.1 (C), 149.1 (C), 170.4 (CO); HRMS (ES<sup>+</sup>) cald. for C<sub>17</sub>H<sub>24</sub>O<sub>5</sub>NaS (MNa<sup>+</sup>) requires 363.1242; found 363.1233; [*α*]<sub>D</sub> = -78.3 (*c* = 0.25, CHCl<sub>3</sub>).

**(1*R*,2*S*,4*S*)-4-(*tert*-Butyldimethylsilyloxy)-2-(3,4-dimethoxybenzylthio)cyclohexyl acetate:**

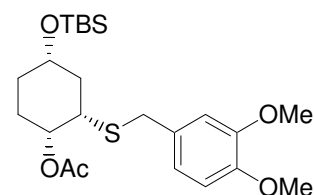

Under nitrogen compound (–)-**22** (0.985 g, 2.89 mmol, 1 equiv.) was dissolved in dry dichloromethane (20 mL). To this TBSCl (0.872 g, 5.79 mmol, 2 equiv.), DBU (1.10 mL, 7.23 mmol, 2.5 equiv.) and catalytic DMAP (5 mg) were added. The reaction was stirred for 18 h. After this time dichloromethane (50 mL) and H<sub>2</sub>O (50 mL) were added. The resulting organic layer was further extracted with 0.1 M HCl (2 × 40 mL), sat. sodium bicarbonate (40 mL) and brine (40 mL). The organic layer was dried over MgSO<sub>4</sub>, filtered and the solvent removed under reduced pressure, purification by flash column chromatography (CH<sub>2</sub>Cl<sub>2</sub>-Pentane; 9:1) afforded the *title compound* (1.185 g, 90%) as a viscous opaque oil. *R*<sub>f</sub> = 0.2 (CH<sub>2</sub>Cl<sub>2</sub>-Pentane; 9:1); *v*<sub>max</sub> (neat/cm<sup>-1</sup>) 3053, 2990, 2946, 2857, 1737, 1513, 1463, 1372, 1254, 1146, 1113, 1081, 1372, 1254, 1146, 1113, 1081, 1029, 987; *δ*<sub>H</sub> (400 MHz, CDCl<sub>3</sub>) 0.04 (6H, s, CH<sub>3</sub>), 0.87 (9H, s, CH<sub>3</sub>), 1.33-1.43 (1H, m, CH<sub>2</sub>), 1.49-1.59 (1H, m, CH<sub>2</sub>), 1.64-1.74 (2H, m, CH<sub>2</sub>), 1.82-1.87 (1H, m, CH<sub>2</sub>), 1.98 (1H, ddd, *J* = 3.0, 6.5, 14.0 Hz, CH<sub>2</sub>), 2.11 (3H, s, CH<sub>3</sub>), 2.58 (1H, ddd, *J* = 3.0, 6.5, 13.0 Hz, CH), 3.50–3.57 (1H, m, CH), 3.69 (1H, d, *J* = 13.5 Hz, CH<sub>2</sub>), 3.74 (1H, d, *J* = 13.5 Hz, CH<sub>2</sub>), 3.87 (3H, s, CH<sub>3</sub>), 3.89 (3H, s, CH<sub>3</sub>), 5.12 (1H, app. q, *J* = 2.5 Hz, CH), 6.77 (1H, d, *J* = 8.0 Hz, ArH), 6.82 (1H, dd, *J* = 2.0, 8.0 Hz, ArH), 6.89 (1H, d, *J* = 2.0 Hz, ArH); *δ*<sub>C</sub> (100 MHz, CDCl<sub>3</sub>) -4.7 (2 × CH<sub>3</sub>), 11.1 (C), 21.2 (CH<sub>3</sub>), 25.8 (CH<sub>3</sub>), 28.1 (CH<sub>2</sub>), 29.6 (CH<sub>2</sub>), 35.2 (CH<sub>2</sub>), 37.1 (CH<sub>2</sub>), 43.6 (CH), 55.8 (CH<sub>3</sub>), 55.9 (CH<sub>3</sub>), 69.2 (CH), 70.2 (CH), 110.9 (CH), 111.8 (CH), 120.9 (CH), 130.4 (C), 148.1 (C), 149.1 (C), 170.6 (CO); HRMS (ES<sup>+</sup>) cald. for C<sub>23</sub>H<sub>38</sub>O<sub>5</sub>SiSNa (MNa<sup>+</sup>) requires 477.2107; found 477.2127; [*α*]<sub>D</sub> = -72.7 (*c* = 1.0, CHCl<sub>3</sub>).

**(1*R*,2*S*,4*S*)-4-(*tert*-Butyldimethylsilyloxy)-2-(3,4-dimethoxybenzylthio)cyclohexanol:**

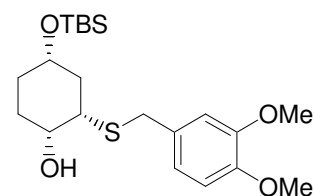

The above acetoxy compound (750 mg, 1.65 mmol, 1 equiv.) was dissolved in MeOH (50 mL), to this potassium carbonate (342 mg, 2.47 mmol, 1.5 equiv.) was added and the reaction was stirred for 18 h. After this time most of the methanol was removed under reduced pressure and

dichloromethane (50 mL) and brine (50 mL) were added. The layers were separated and the resulting aqueous layer was extracted with dichloromethane (2 × 30 mL). The combined organic layers were dried over MgSO<sub>4</sub>, filtered and the solvent removed under reduced pressure. Purification by flash column chromatography (dichloromethane-MeOH; 100:1) afforded the *title compound* (647 mg, 95%) as a clear oil.  $R_f$  = 0.2 (dichloromethane-MeOH; 100:1);  $\nu_{\max}$  (neat/cm<sup>-1</sup>) 3509, 3053, 2993, 2938, 2856, 1593, 1513, 1463, 1423, 1375, 1344, 1258, 1193, 1139, 1110, 1086, 1032, 975;  $\delta_H$  (400 MHz, CDCl<sub>3</sub>) 0.02 (6H, s, CH<sub>3</sub>), 0.86 (9H, s, CH<sub>3</sub>), 1.28-1.35 (1H, m, CH<sub>2</sub>), 1.55-1.76 (4H, m, CH<sub>2</sub>), 2.04 (1H, ddd,  $J$  = 3.5, 7.0, 14.5 Hz, CH<sub>2</sub>), 2.70 (1H, ddd,  $J$  = 2.5, 4.0, 13.0 Hz, CH), 3.48-3.56 (1H, m, CH), 3.67 (1H, d,  $J$  = 13.5 Hz, CH<sub>2</sub>), 3.72 (1H, d,  $J$  = 13.5 Hz, CH<sub>2</sub>), 3.77-3.79 (1H, m, CH), 3.87 (3H, s, CH<sub>3</sub>), 3.88 (3H, s, CH<sub>3</sub>), 6.77-6.82 (2H, m, ArH), 6.87 (1H, d,  $J$  = 1.5 Hz, ArH);  $\delta_C$  (100 MHz, CDCl<sub>3</sub>) -4.7 (CH<sub>3</sub>), -4.6 (CH<sub>3</sub>), 18.0 (C), 25.8 (CH<sub>3</sub>), 28.8 (CH<sub>2</sub>), 28.9 (CH<sub>2</sub>), 34.5 (CH<sub>2</sub>), 35.7 (CH<sub>2</sub>), 46.9 (CH), 55.8 (CH<sub>3</sub>), 55.9 (CH<sub>3</sub>), 64.1 (CH), 70.5 (CH), 110.9 (CH), 111.7 (CH), 120.8 (CH), 130.2 (C), 148.2 (C), 149.1 (C); HRMS (ES<sup>+</sup>) calcd. for C<sub>21</sub>H<sub>37</sub>O<sub>4</sub>SiS (MH<sup>+</sup>) requires 413.2182; found 413.2200;  $[\alpha]_D$  = -58.4 ( $c$  = 1.0, CHCl<sub>3</sub>).

**(1R,2S,4S)-4-(tert-Butyldimethylsilyloxy)-2-(3,4-dimethoxybenzylsulfanyl)cyclo-hexanol (–)-23:**

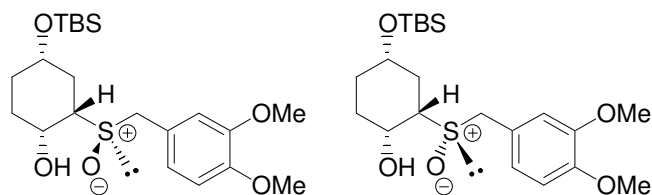

The above secondary alcohol (0.961 g, 2.33 mmol, 1 equiv.) was dissolved in MeOH (30 mL) and the solution was brought to 0 °C. NaIO<sub>4</sub> (0.498 mg, 2.33 mmol, 1 equiv.) dissolved in H<sub>2</sub>O (30 mL) was added and the reaction was stirred for 45 min at this temperature and then for 4 h at rt. Most of the methanol was removed under reduced pressure and dichloromethane (50 mL) was added. The layers were separated and the resulting aqueous layer was extracted with dichloromethane (2 x 30 mL). The combined organic layers were dried over MgSO<sub>4</sub>, filtered and the solvent removed under reduced pressure. Purification by flash column chromatography (cyclohexane-EtOAc; 1:1) afforded **23** (0.779 g, 78%) as an amorphous white solid 3:2 mixture of diastereoisomers, M.p. = 125-128 °C. Data for the major diastereoisomer, M.p. = 162-163 °C.  $R_f$  = 0.05 (cyclohexane-EtOAc; 1:1);  $\nu_{\max}$  (neat/cm<sup>-1</sup>) 3303, 3015, 2949, 2855, 1590, 1518, 1464, 1342, 1258, 1214, 1191, 1151, 1108, 1073, 1026, 975;  $\delta_H$  (400 MHz, CDCl<sub>3</sub>) 0.04 (6H, s, CH<sub>3</sub>), 0.85 (9H, s, CH<sub>3</sub>), 1.29-1.36 (1H, m, CH<sub>2</sub>), 1.61-1.72 (2H, m, CH<sub>2</sub>), 1.76-1.86 (1H, m, CH<sub>2</sub>), 1.97 (1H, ddd,  $J$  = 3.5, 7.5, 14.5 Hz, CH<sub>2</sub>), 2.10-2.24 (1H, m, CH<sub>2</sub>), 2.36 (1H, ddd,  $J$  = 2.5, 3.5, 13.5 Hz, CHS), 3.53-3.60 (1H, m, CH), 3.86 (6H, s(br), CH<sub>3</sub>), 4.03 (1H, s, OH), 4.05 (2H, s, CH<sub>2</sub>), 4.54-4.59 (1H, m, CH), 6.79-6.84 (3H, m,

ArH);  $\delta_C$  (100 MHz,  $CDCl_3$ ) -4.4 ( $CH_3$ ), -4.3 ( $CH_3$ ), 18.2 (C), 26.0 ( $CH_3$ ), 29.3 ( $CH_2$ ), 30.9 ( $CH_2$ ), 31.8 ( $CH_2$ ), 55.6 ( $CH_2$ ), 56.1 ( $CH_3$ ), 56.2 ( $CH_3$ ), 56.8 (CH), 64.2 (CH), 70.3 (CH), 111.7 (CH), 113.0 (CH), 122.3 (C), 122.6 (CH), 149.5 (C), 149.6 (C); HRMS ( $ES^+$ ) calcd. for  $C_{21}H_{37}O_5SiS$  ( $MH^+$ ) requires 429.2131; found 429.2110;  $[\alpha]_D = -50.0$  ( $c = 0.25$ ,  $CHCl_3$ ). Data for both diastereoisomers: M.p. = 125-128 °C.  $\delta_H$  (400 MHz,  $CDCl_3$ ); 0.04 (6H, s,  $CH_3^*$ ), 0.07 (3H, s,  $CH_3^{\wedge}$ ), 0.08 (3H, s,  $CH_3^{\wedge}$ ), 0.87 (9H, s,  $CH_3^*$ ), 0.89 (9H, s,  $CH_3^{\wedge}$ ), 1.30-1.39 (2H, m,  $CH_2^*$ ,  $CH_2^{\wedge}$ ), 1.62-2.03 (8H, m,  $4 \times CH_2^*$ ,  $4 \times CH_2^{\wedge}$ ), 2.09-2.24 (2H, m,  $CH_2^*$ ,  $CH_2^{\wedge}$ ), 2.36-2.45 (2H, m,  $CH^*-S$ ,  $CH^{\wedge}-S$ ), 3.32 (1H, s,  $OH^{\wedge}$ ), 3.53-3.68 (2H, m,  $CH^*-OTBS$ ,  $CH^{\wedge}-OTBS$ ), 3.87 (12H, s(br),  $CH_3^*$ ,  $CH_3^{\wedge}$ ), 3.96 (1H, d,  $J = 13.0$  Hz,  $CH_2^{\wedge}-S$ ), 4.04-4.07 (4H, m,  $OH^*$ ,  $2 \times CH_2^*-S$ ,  $CH_2^{\wedge}-S$ ), 4.28-4.32 (1H, m,  $CH^{\wedge}-OH$ ), 4.55-4.59 (1H, m,  $CH^*-OH$ ), 6.78-6.86 (6H, m,  $3 \times ArH^*$ ,  $3 \times ArH^{\wedge}$ );  $\delta_C$  (100 MHz,  $CDCl_3$ ) -4.4 ( $CH_3^*$ ), -4.3 ( $2 \times CH_3^{\wedge}$ ), -4.3 ( $CH_3^*$ ), 18.2 ( $C^*$ ), 18.3 ( $C^{\wedge}$ ), 26.0 ( $CH_3^*$ ), 26.0 ( $CH_3^{\wedge}$ ), 29.3 ( $CH_2^*$ ), 29.9 ( $CH_2^{\wedge}$ ), 30.9 ( $CH_2^*$ ), 31.3 ( $CH_2^{\wedge}$ ), 31.8 ( $CH_2^*$ ), 31.9 ( $CH_2^{\wedge}$ ), 54.9 ( $CH_2^{\wedge}$ ), 55.6 ( $CH_2^*$ ), 56.1 ( $CH_3^*$ ,  $CH_3^{\wedge}$ ), 56.2 ( $CH_3^*$ ,  $CH_3^{\wedge}$ ), 57.2 ( $CH-S^*$ ), 57.5 ( $CH-S^{\wedge}$ ), 64.1 ( $CH-OH^*$ ), 66.3 ( $CH-OH^{\wedge}$ ), 70.3 ( $CH-OTBS^*$ ), 70.6 ( $CH-OTBS^{\wedge}$ ), 111.7 ( $CH^*$ ), 111.7 ( $CH^{\wedge}$ ), 112.9 ( $CH^{\wedge}$ ), 113.0 ( $CH^*$ ), 122.3 ( $C^*$ ), 122.4 ( $CH^{\wedge}$ ), 122.5 ( $C^{\wedge}$ ), 122.6 ( $CH^*$ ), 149.4 ( $C^{\wedge}$ ), 149.5 ( $2 \times C^*$ ,  $1 \times C^{\wedge}$ ).

**(1R,4S)-4-(tert-Butyldimethylsilyloxy)cyclohex-2-enol (–)-20:<sup>9,10</sup>**

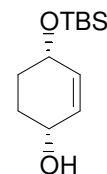

In a sealed tube **23** (70 mg, 0.16 mmol, 1 equiv.) was dissolved in mesitylene (3 mL) and  $CaCO_3$  (70 mg, 0.70 mmol, 4.4 equiv.) was added. The reaction was heated under nitrogen at 165 °C for 3 h. The solvent was removed under reduced pressure and the residue was dissolved in  $CH_2Cl_2$  (10 mL) and  $H_2O$  (10 mL). The resultant aqueous layer was extracted with  $CH_2Cl_2$  (2 x 10 mL). The combined organic layers were dried over  $MgSO_4$ . Filtration and removal of the solvent *in vacuo* afforded the crude material which was purified by flash column chromatography (cyclohexane-EtOAc; 15:1) to afford (–)-**20** (5.5 mg, 14%) as a clear oil.  $R_f = 0.6$  (pentane -EtOAc; 1:1); with spectroscopic data as above;  $[\alpha]_D = -37.6$  ( $c = 0.2$ ,  $CHCl_3$ ); {lit.  $[\alpha]_D = -30$  ( $c = 0.4$ , EtOH)}.<sup>9</sup> Further elution gave **23** (50 mg, 71%) as a single diastereoisomer.

**(S)-4-(tert-Butyldimethylsilyloxy)cyclohex-2-enone (–)-19:<sup>2,13</sup>**

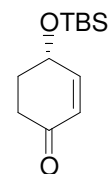

Under nitrogen (–)-**20** (8 mg, 0.035 mmol, 1 equiv.) was dissolved in dry dichloromethane (2 mL). Dess-Martin periodinane (18 mg, 0.042 mmol, 1.2 equiv.) was added and the reaction stirred for 30 mins. Sat. sodium bicarbonate solution (3 mL) and sat. sodium thiosulfate solution (3 mL) were added and the reaction stirred for 20 min. The layers were separated and the resulting aqueous layer was extracted with dichloromethane (2 x 5 mL). The combined organic layers were dried over MgSO<sub>4</sub>, filtered and the solvent removed under reduced pressure to afford (–)-**19** (7 mg, 88%) as a clear oil.  $R_f = 0.15$  (CH<sub>2</sub>Cl<sub>2</sub>);  $\nu_{\max}$  (neat/cm<sup>-1</sup>) 3020, 3000, 2942, 2840, 1675, 1377, 1245;  $\delta_H$  (400 MHz, CDCl<sub>3</sub>) 0.12 (3H, s, CH<sub>3</sub>), 0.13 (3H, s, CH<sub>3</sub>), 0.91 (9H, s, CH<sub>3</sub>), 1.95-2.05 (1H, m, CH<sub>2</sub>), 2.17-2.24 (1H, m, CH<sub>2</sub>), 2.30-2.39 (1H, m, CH<sub>2</sub>), 2.54-2.60 (1H, m, CH<sub>2</sub>), 4.50-4.55 (1H, m, CH), 5.92 (1H, ddd,  $J = 1.0, 2.0, 10.0$  Hz, CH), 6.83 (1H, ddd,  $J = 1.5, 2.5, 10.0$  Hz, CH);  $\delta_C$  (100 MHz, CDCl<sub>3</sub>) -4.8 (CH<sub>3</sub>), -4.6 (CH<sub>3</sub>), 18.1 (C), 25.7 (CH<sub>3</sub>), 32.9 (CH<sub>2</sub>), 35.5 (CH<sub>2</sub>), 67.0 (CH), 128.7 (CH), 153.9 (CH), 198.8 (CO); HRMS (CI) cald. for C<sub>12</sub>H<sub>26</sub>O<sub>2</sub>SiN (MNH<sub>4</sub><sup>+</sup>) requires 244.17791; found 244.17786;  $[\alpha]_D^{20} = +101.0$  ( $c = 1.0$ , CHCl<sub>3</sub>); {lit.  $[\alpha]_D^{20} = +107.1$  ( $c = 1.3$ , CHCl<sub>3</sub>)}.<sup>13</sup>

**(2S,4S)-4-(tert-Butyldimethylsilyloxy)-2-(3,4-dimethoxybenzylsulfinyl)cyclo-hexanone (–)-24:**

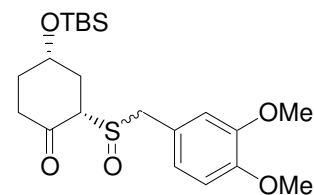

Under nitrogen compound (–)-**23** (76 mg, 0.18 mmol, 1.0 equiv.) was dissolved in dry dichloromethane (10 mL), to this Dess-Martin Periodinane (90 mg, 0.21 mmol, 1.2 equiv.) was added and the reaction was stirred for 1 h. Sat. sodium bicarbonate solution (10 mL) and sat. sodium thiosulfate solution (10 mL) were added and the reaction stirred for 15 min. The layers were separated and the resulting aqueous layer was extracted with dichloromethane (2 x 10 mL). The combined organic layers were dried over MgSO<sub>4</sub>, filtered and the solvent removed under reduced pressure. Purification by flash column chromatography (pentane-EtOAc; 1:1) afforded the title compound (–)-**24** (44 mg, 58%) as a clear oil.  $R_f = 0.1$  (pentane-EtOAc; 1:1);  $\nu_{\max}$  (neat/cm<sup>-1</sup>) 3015, 2934, 2856, 1734, 1712, 1593, 1514, 1463, 1421, 1370, 1344, 1257, 1149, 1115, 1081, 1028, 957;

$\delta_{\text{H}}$  (400 MHz,  $\text{CDCl}_3$ ) 0.03 (3H, s,  $\text{CH}_3$ ), 0.06 (3H, s,  $\text{CH}_3$ ), 0.82 (9H, s,  $\text{CH}_3$ ), 1.82-1.93 (1H, m,  $\text{CH}_2$ ), 2.00-2.13 (2H, m,  $\text{CH}_2$ ), 2.30-2.42 (2H, m,  $\text{CH}_2$ ), 2.62-2.73 (1H, m,  $\text{CH}_2$ ), 3.56-3.63 (1H, dd,  $J = 6.5, 12.5$  Hz, CH), 3.85 (3H, s,  $\text{CH}_3$ ), 3.86 (3H, s,  $\text{CH}_3$ ), 3.98 (1 H, d,  $J = 13.5$  Hz,  $\text{CH}_2$ ), 4.14 (1 H, d,  $J = 13.5$  Hz,  $\text{CH}_2$ ), 4.31-4.37 (1H, m, CH), 6.75 (1H, dd,  $J = 2.0, 8.0$  Hz, ArH). 6.80-6.83 (2H, m, ArH);  $\delta_{\text{C}}$  (100 MHz,  $\text{CDCl}_3$ ) -5.0 ( $\text{CH}_3$ ), 17.8 (C), 25.6 ( $\text{CH}_3$ ), 33.6 ( $\text{CH}_2$ ), 34.0 ( $\text{CH}_2$ ), 37.0 ( $\text{CH}_2$ ), 55.7 ( $\text{CH}_3$ ), 55.9 ( $\text{CH}_3$ ), 56.0 ( $\text{CH}_2$ ), 61.6 (CH), 64.8 (CH), 111.0 (CH), 112.9 (CH), 122.2 (C), 122.4 (CH), 149.1 (C), 149.2 (C), 207.2 (CO); HRMS ( $\text{ES}^-$ ) calcd. for  $\text{C}_{21}\text{H}_{34}\text{O}_5\text{SiS}$  ( $\text{M-H}^-$ ) requires 425.1818; found 425.1822;  $[\alpha]_{\text{D}} = -10$  ( $c = 0.1$ ,  $\text{CHCl}_3$ ).

**(S)-4-(tert-Butyldimethylsilyloxy)cyclohex-2-enone (-)-19:**<sup>2,13</sup>

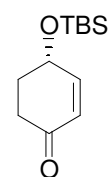

In a sealed tube (-)-**24** (25 mg, 0.059 mmol, 1 equiv.) was dissolved in toluene (3 mL) and  $\text{CaCO}_3$  (25 mg, 0.25 mmol, 4.2 equiv.) was added. The reaction was heated under nitrogen at 110 °C for 1 h. The solvent was removed under reduced pressure and resulting residue and the resulting residue was taken up in  $\text{CH}_2\text{Cl}_2$  (5 mL).  $\text{H}_2\text{O}$  (5 mL) was added and the resultant aqueous layer was extracted with  $\text{CH}_2\text{Cl}_2$  (2 x 5 mL). The combined organic layers were dried over  $\text{MgSO}_4$ . Filtration and removal of the solvent *in vacuo* afforded the crude material which was purified by flash column chromatography (pentane- $\text{CH}_2\text{Cl}_2$ ; 1:1) which gave (-)-**19** (10 mg, 75%) as a clear oil.  $[\alpha]_{\text{D}} = -99$  ( $c = 0.3$ ,  $\text{CHCl}_3$ ), where additional data was as reported above.

**References:**

1. (a) S. K. Basra, M. G. B. Drew, J. Mann and P. D. Kane, *J. Chem. Soc., Perkin Trans. I*, 2000, 3592; (b) H. L. Holland, F. M. Brown, P. C. Chenchaiiah and J. A. Rao, *Can. J. Chem.* 1990, **68**, 282; (c) G. Kruger, C. Harde and F. Bohlmann, *Tetrahedron Lett.*, 1985; **26**, 6027; (d) T. T. Curran, D. A. Hay, C. P. Koegel and J. C. Evans, *Tetrahedron*, 1997, **53**, 1983; (e) N. Becker and E. M. Carreira, *Org. Lett.*, 2007, **9**, 3857.
2. J. F. Bickley, P. Evans, A. Meek, B. S. Morgan and S. M. Roberts, *Tetrahedron: Asymm.*, 2006, **17**, 355.
3. X. Verdaguer, J. Vázquez, G. Fuster, V. Bernardes-Génisson, A. E. Greene, A. Moyano, M. A.; Pericàs, A. Riera, *J. Org. Chem.*, 1998, **63**, 7037.



4. B. Figadhré, C. Chaboche, X. Franck, J. Peyrat and A. Cave, *J. Org. Chem.*, 1994, **59**, 7138.
5. S. Howell, N. Spencer and D. Philp, *Tetrahedron*, 2001, **57**, 4945.
6. R. Crossley and A. Curran, *J. Chem. Soc. Perkin Trans. 1*, 1974, 2327.
7. S. Kamata, T. Aoki and W. Nagata, *Org. Synth. Coll.* 1988, **6**, 996.
8. (a) M. Pour and E. Negishi, *Tetrahedron Lett.*, 1996, **37**, 4679; (b) S. J. Danishefsky and B. Simoneau, *J. Am. Chem. Soc.*, 1989, **111**, 2599.
9. P. Bayón, G. Marjanet, G. Toribio, R. Alibés, P. de March, M. Figueredo, J. Font, *J. Org. Chem.* 2008, **73**, 3486.
10. R. G. P. Gatti, A. L. E. Larsson and J. -E. Bäckvall; *J. Chem. Soc., Perkin Trans. 1*, 1997, 577.
11. H. Suzuki, N. Yamazaki and C. Kibayashi, *J. Org. Chem.* 2001, **66**, 1494.
12. M. C. Carreño, J. L. G. Ruano, M. Garrido, M. P. Ruiza, G. Solladié, *Tetrahedron. Lett.*, 1990, **31**, 6653.
13. M. C. Witschel and H. J. Bestmann, *Synthesis*, 1997, 107.

Compound *cis*-4a

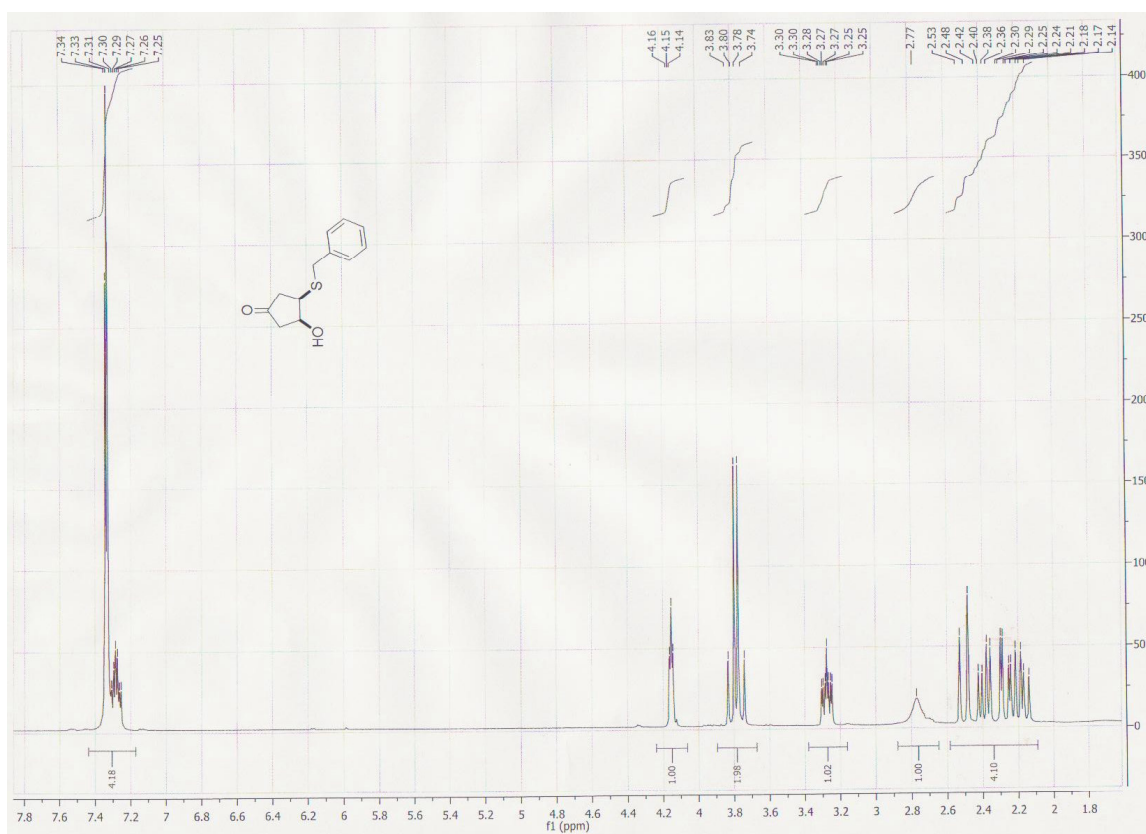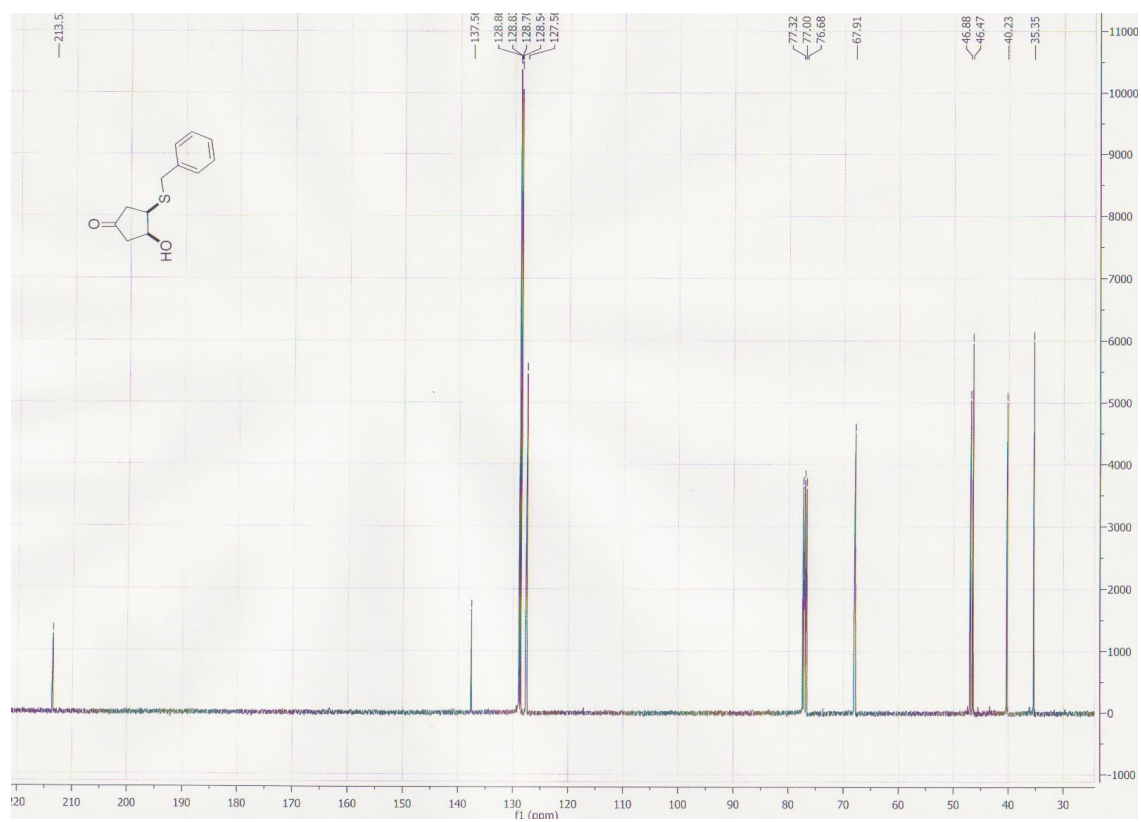

Compound *trans*-4a

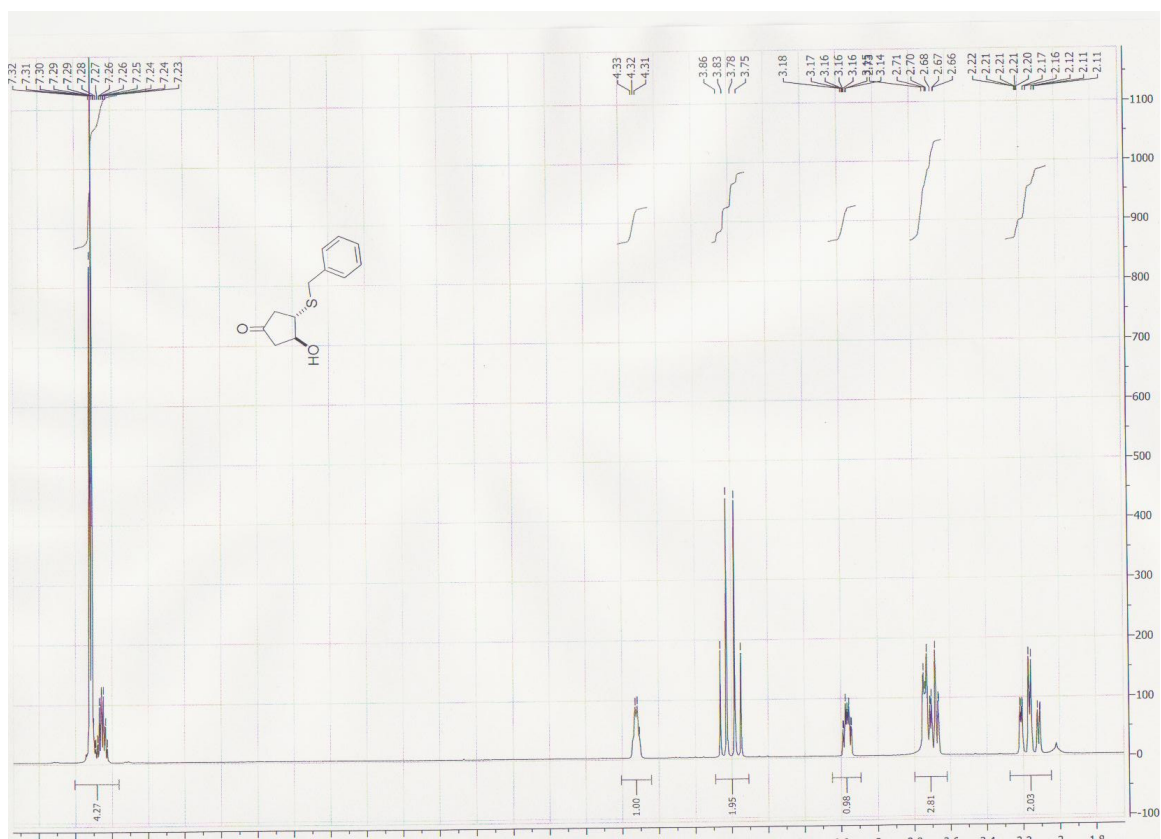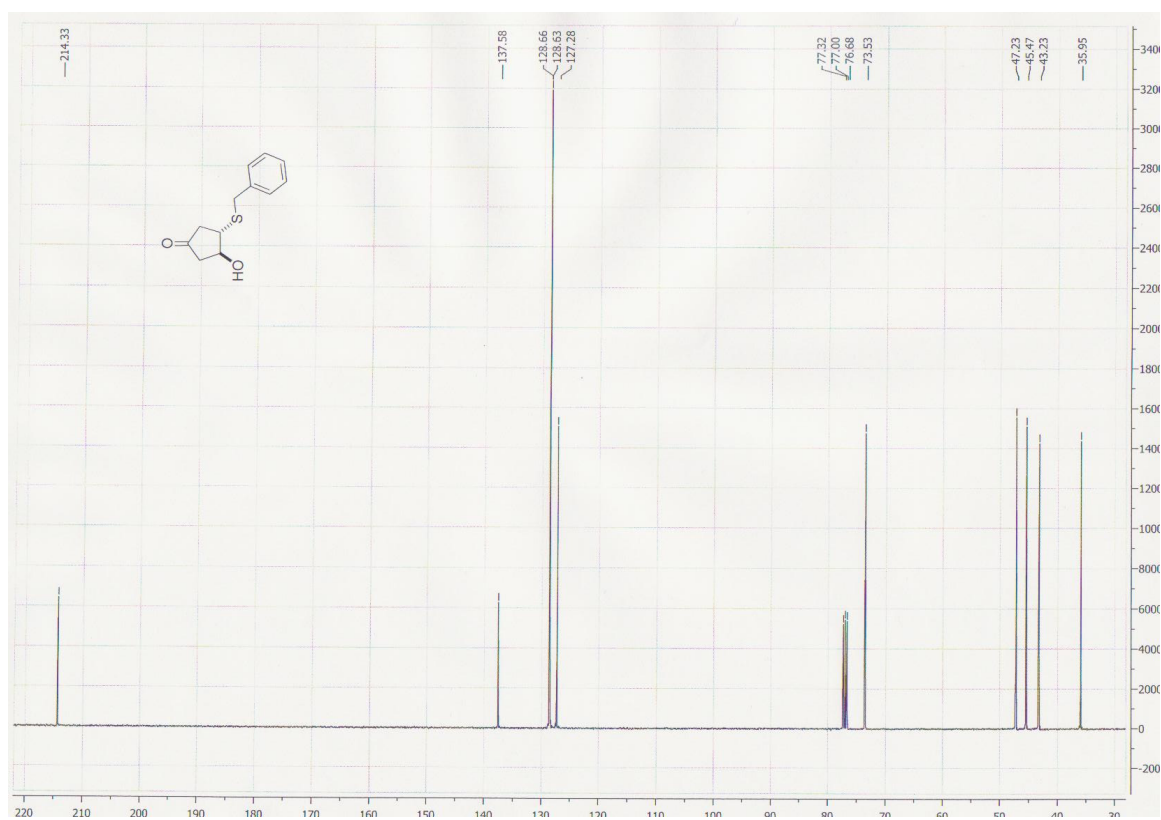

Compound *cis*-**4b**

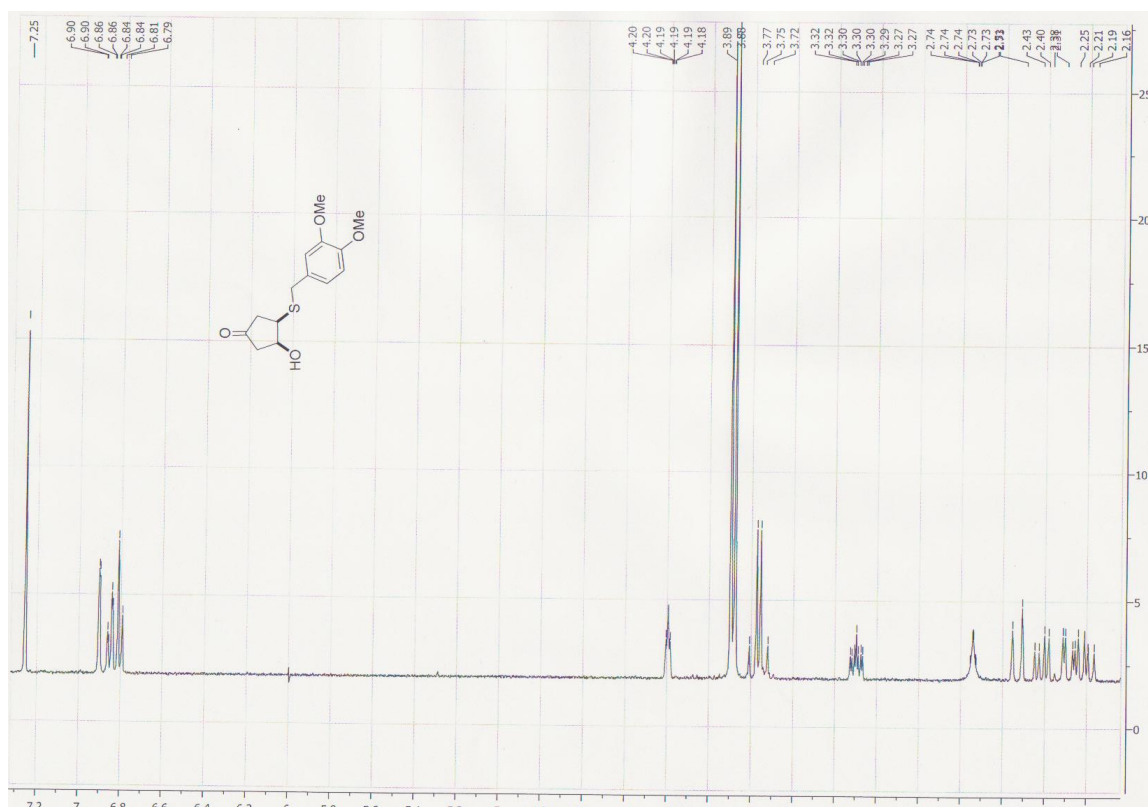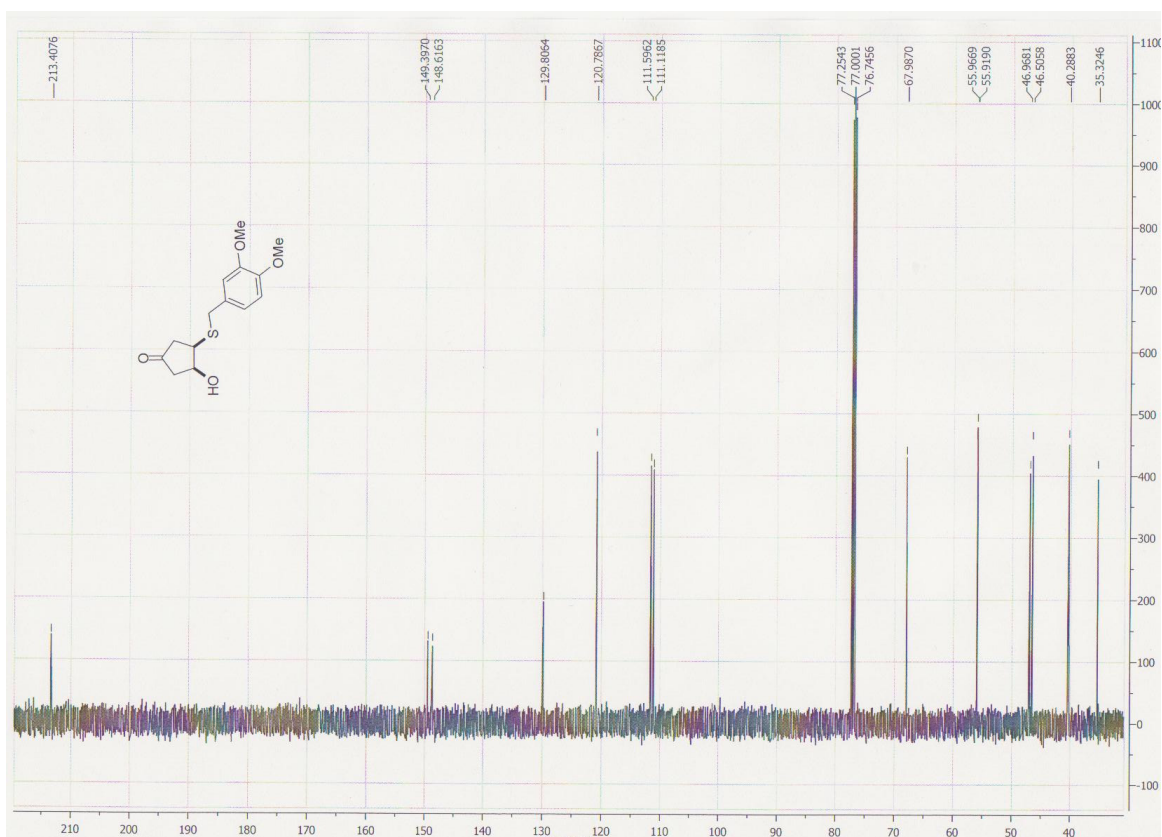



Compound **6a**

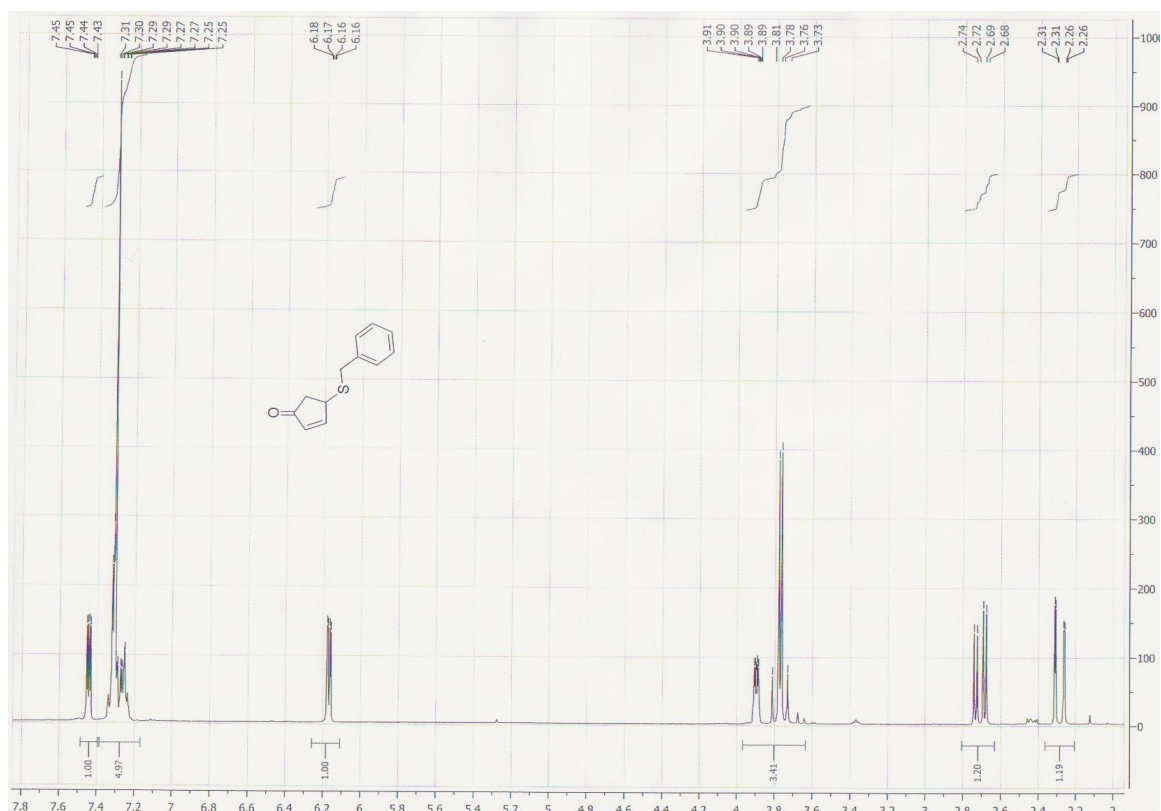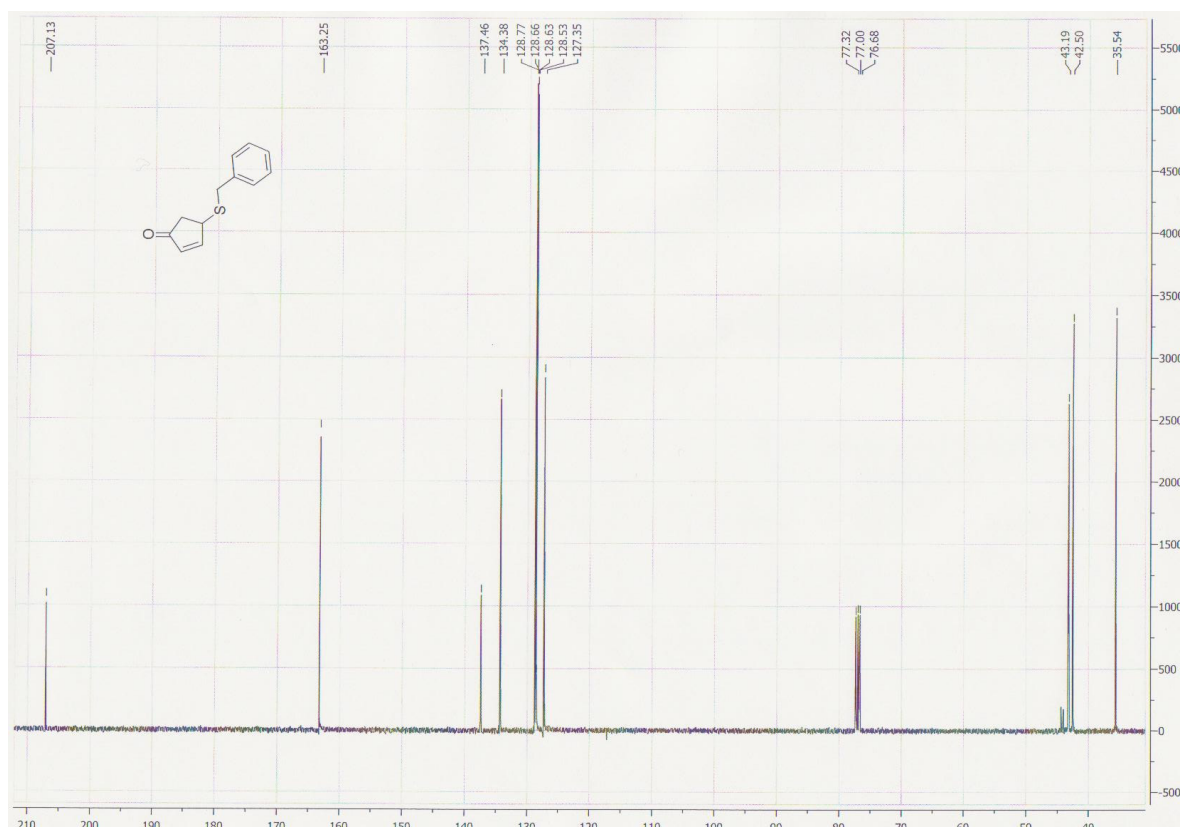

Compound **6b**

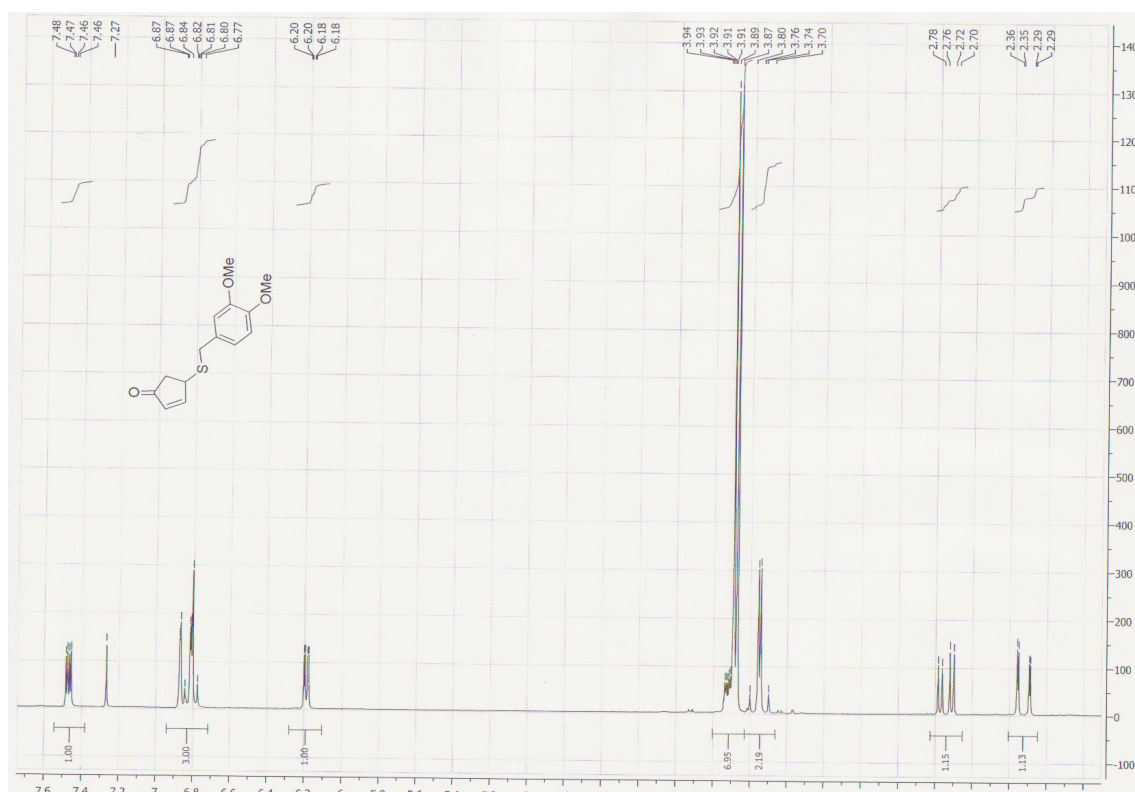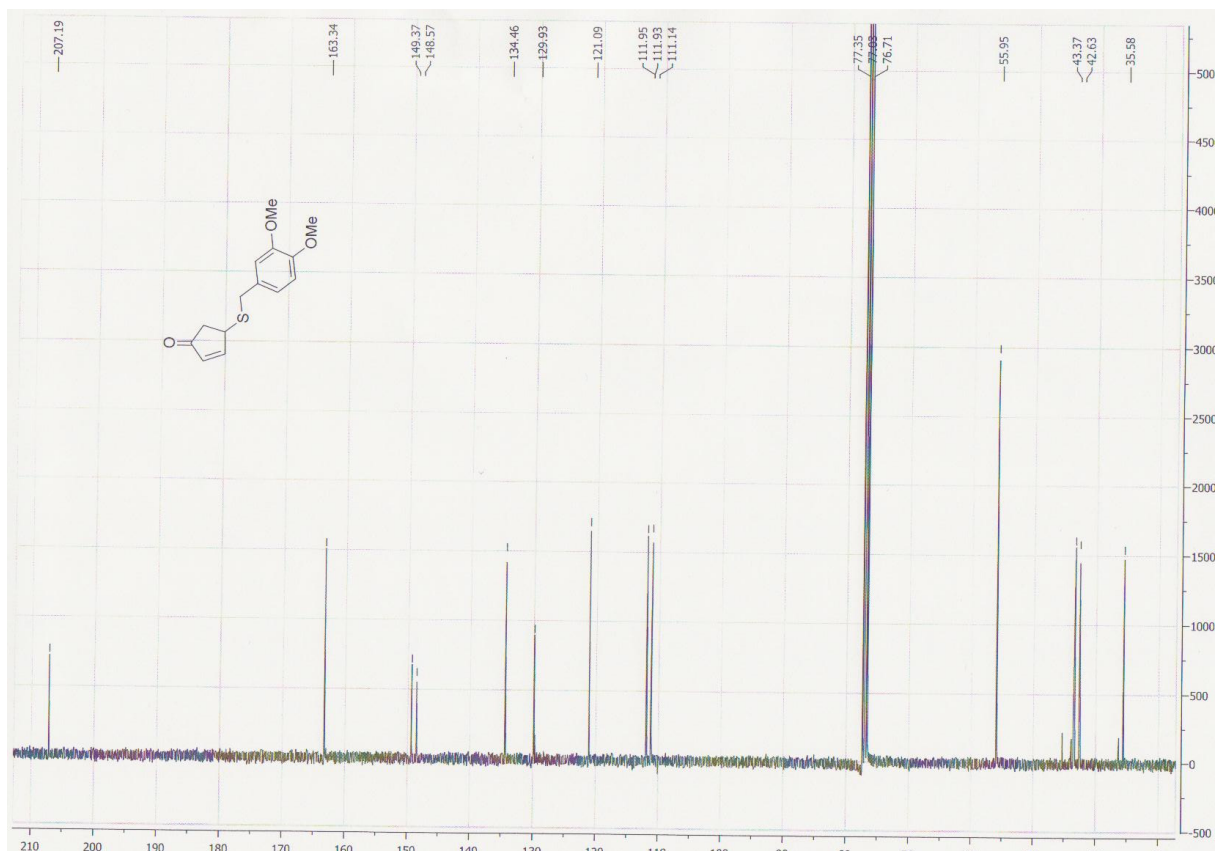

# HPLC Traces (-)- and (+)-6b

File Name: CPminusASH3

```
=====
Acq. Operator   : General sequence          Seq. Line :    5
Acq. Instrument : Instrument 1              Location  : Vial 23
Injection Date  : 17/06/2008 11:17:23      Inj       :    1
                                           Inj Volume: 5 µl
Different Inj Volume from Sequence !      Actual Inj Volume : 10 µl
Acq. Method     : C:\Chem32\1\DATA\SEQUENCE DATA\GENERAL SEQUENCE1 2008-06-17 09-31-20\
                                           MULTI_ISO_30_MIN_50_50_06ML.M
Last changed    : 17/06/2008 10:12:09 by General sequence
Analysis Method : C:\CHEM32\1\DATA\OTHER PEOPLES CHROMATOGRAMS\PE GROUP\CPMINUSASH2.D\DA.M
                                           (MULTI_ISO_30_MIN_50_50_06ML.M)
Last changed    : 17/06/2008 09:31:18 by General sequence
Sample Info     : CP (-)
                                           AS-H column 50:50 heptane/EtOH, 0.5 ml/min
=====
```

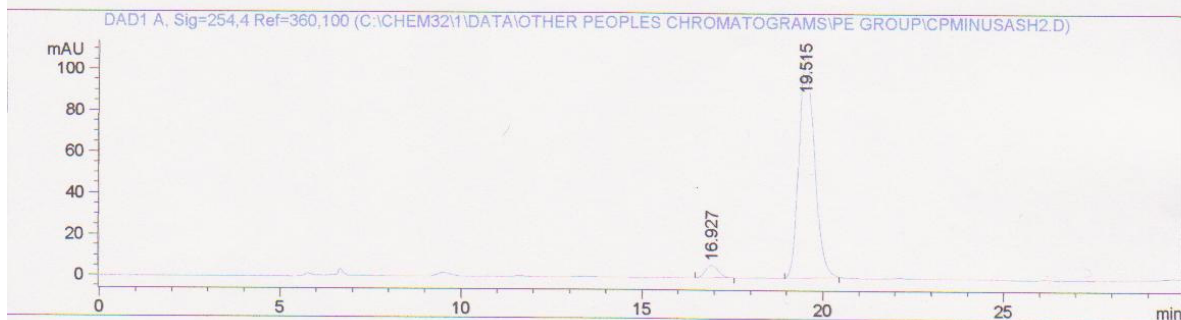

## Area Percent Report

```
=====
Sorted By      :      Signal
Multiplier     :      1.0000
Dilution       :      1.0000
Use Multiplier & Dilution Factor with ISTDs
=====
```

Signal 1: DAD1 A, Sig=254,4 Ref=360,100

| Peak # | RetTime [min] | Type | Width [min] | Area [mAU*s] | Height [mAU] | Area %  |
|--------|---------------|------|-------------|--------------|--------------|---------|
| 1      | 16.927        | BB   | 0.3814      | 159.76396    | 6.48599      | 4.6263  |
| 2      | 19.515        | BB   | 0.4695      | 3293.59619   | 108.69333    | 95.3737 |

Totals : 3453.36015 115.17932

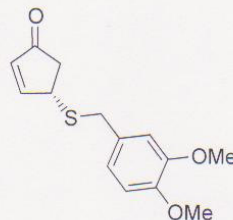

\*\*\* End of Report \*\*\*



e Name: CPplusASH2

```
=====
cq. Operator   : General sequence          Seq. Line :    3
cq. Instrument : Instrument 1              Location  : Vial 22
Injection Date : 17/06/2008 10:14:29      Inj       :    1
                                           Inj Volume: 5 µl
Different Inj Volume from Sequence !      Actual Inj Volume : 10 µl
cq. Method     : C:\Chem32\1\DATA\SEQUENCE DATA\GENERAL SEQUENCE1 2008-06-17 09-31-20\
                MULTI_ISO_30_MIN_50_50_06ML.M
Last changed   : 17/06/2008 10:12:09 by General sequence
Analysis Method : C:\CHEM32\1\DATA\OTHER PEOPLES CHROMATOGRAMS\PE GROUP\CPPLUSASH2.D\DA.M
                (MULTI_ISO_30_MIN_50_50_06ML.M)
Last changed   : 17/06/2008 09:31:18 by General sequence
Sample Info    : CP (+)
                AS-H column 50:50 heptane/EtOH, 0.5 ml/min
=====
```

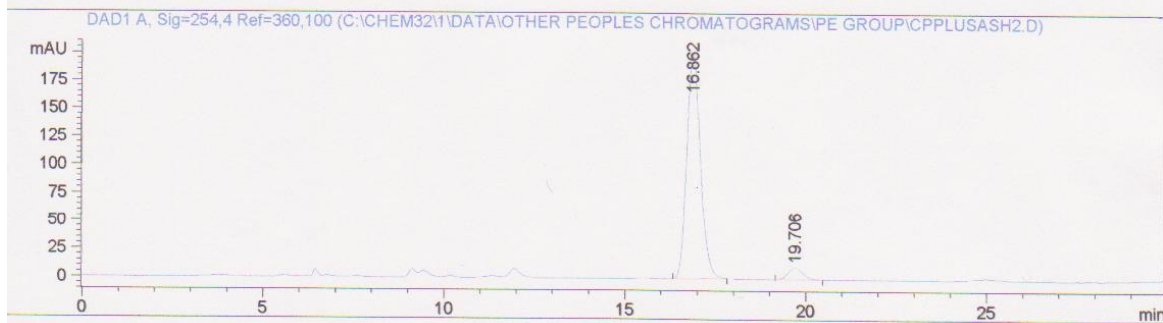

# Area Percent Report

```
=====
Reported By      : Signal
Multiplier       : 1.0000
Resolution       : 1.0000
Use Multiplier & Dilution Factor with ISTDs
=====
```

Signal 1: DAD1 A, Sig=254,4 Ref=360,100

| Peak # | RetTime [min] | Type | Width [min] | Area [mAU*s] | Height [mAU] | Area %  |
|--------|---------------|------|-------------|--------------|--------------|---------|
| 1      | 16.862        | BB   | 0.4069      | 5315.20752   | 200.73322    | 94.3813 |
| 2      | 19.706        | BB   | 0.4532      | 316.42413    | 10.63160     | 5.6187  |

Totals : 5631.63165 211.36481

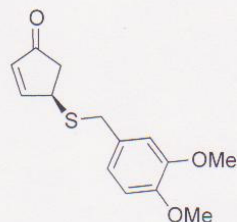

\*\*\* End of Report \*\*\*



Compound 10

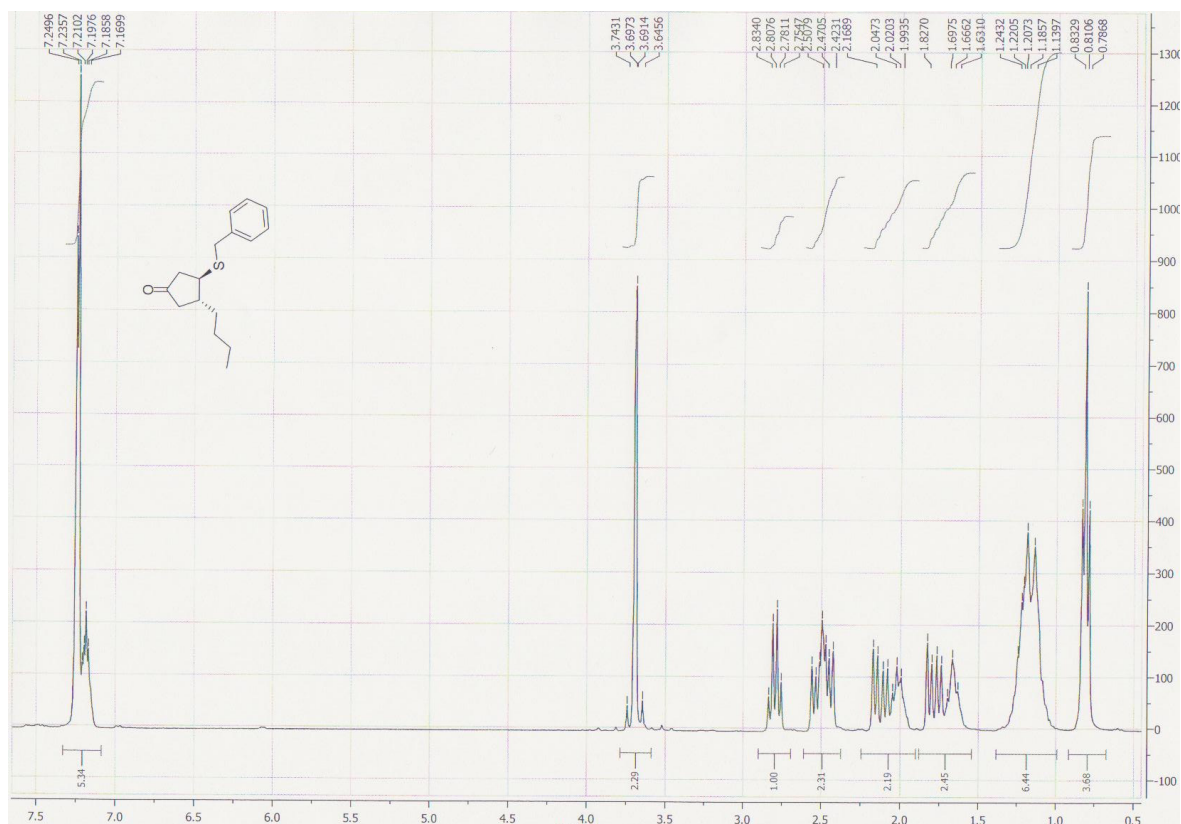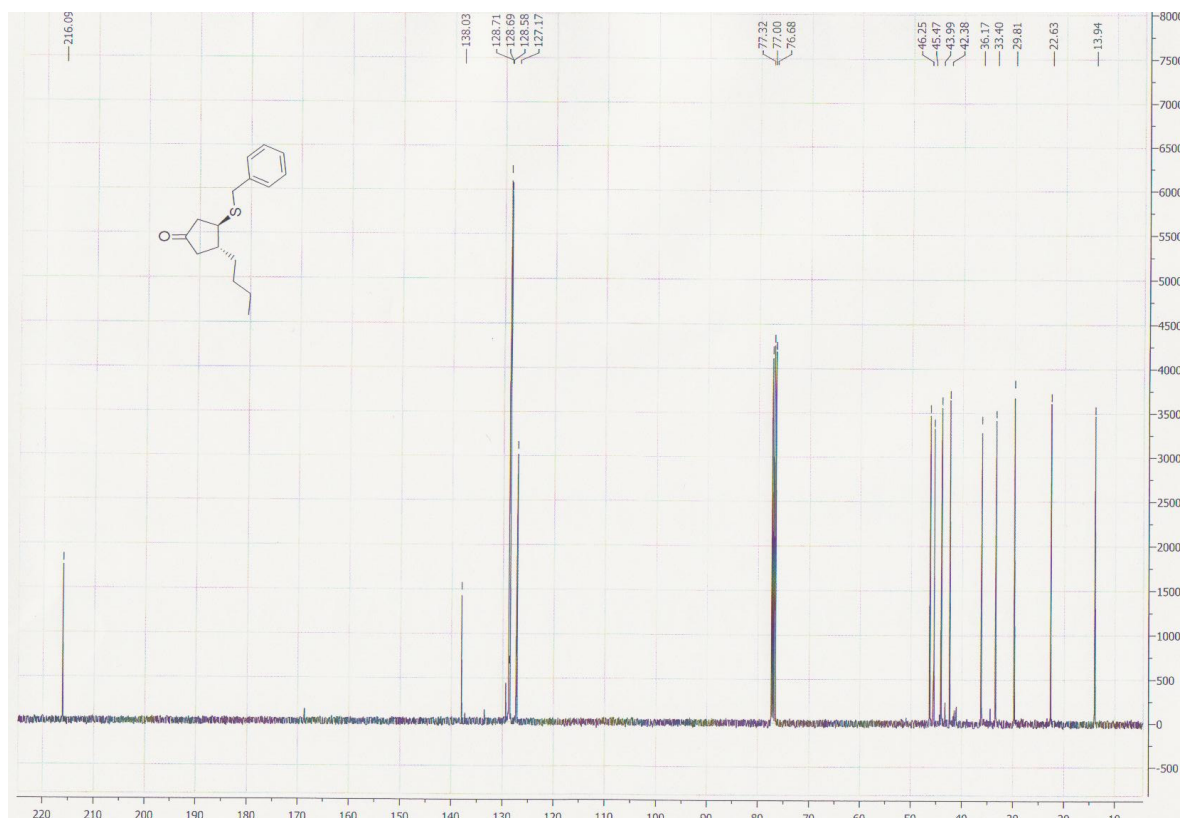

# Compound 16

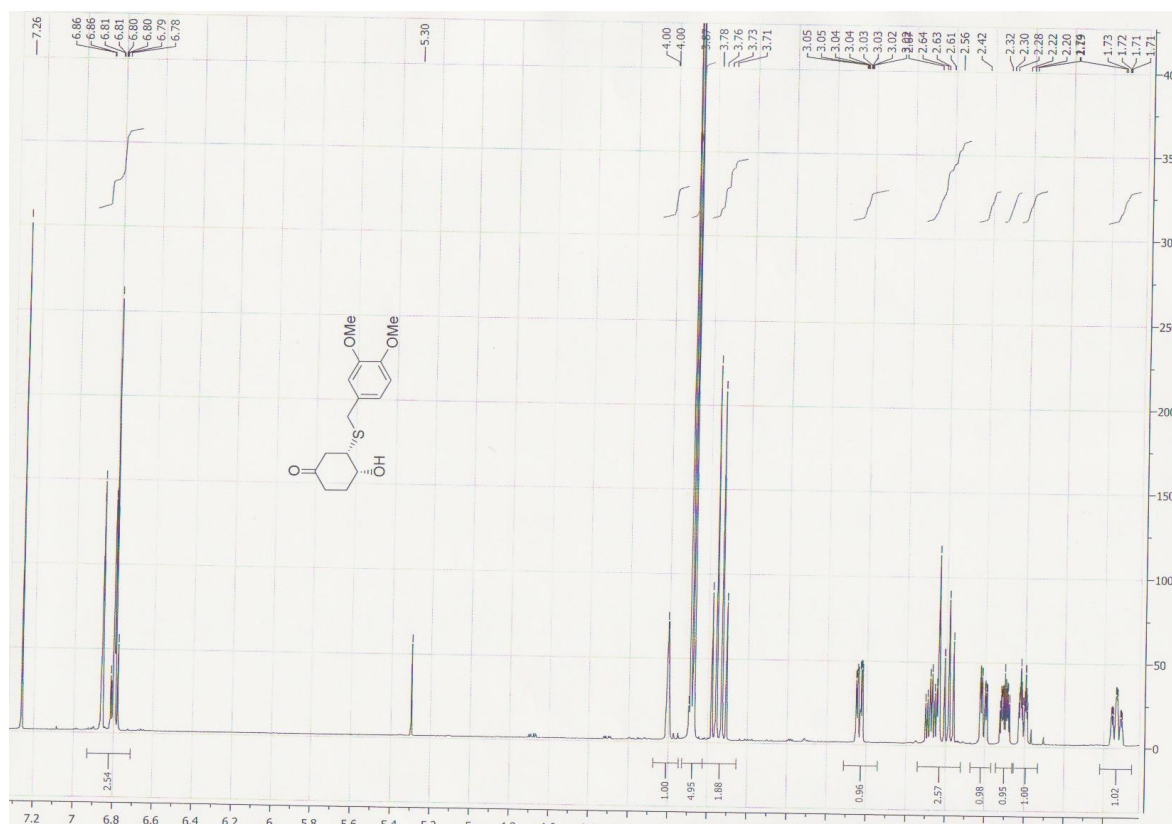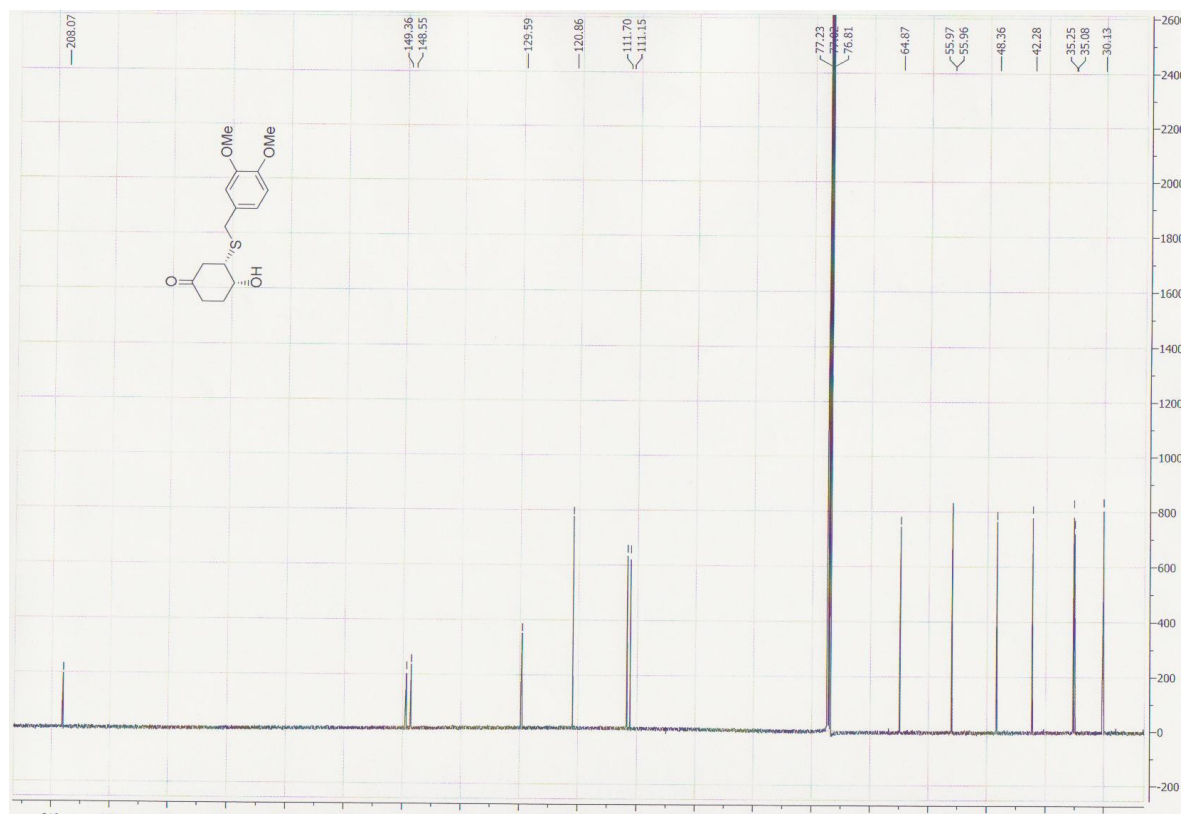

# HPLC traces (±)- and (+)-16

```

=====
Acq. Operator   : General sequence          Seq. Line :    6
Acq. Instrument : Instrument 1              Location  : Vial 2
Injection Date  : 11/08/2008 21:18:29      Inj       :    1
                                           Inj Volume: 5 µl
Different Inj Volume from Sequence !      Actual Inj Volume : 2 µl
Acq. Method     : C:\Chem32\1\DATA\SEQUENCE DATA\GENERAL SEQUENCE1 2008-08-11 19-42-54\
                                           MULTI_ISO_60_MIN_80_20_1ML.M
Last changed    : 13/10/2006 09:30:01 by General sequence
Analysis Method : C:\CHEM32\1\DATA\OTHER PEOPLES CHROMATOGRAMS\PE GROUP\CM141COHRAC2.D\
                                           M (MULTI_ISO_60_MIN_80_20_1ML.M)
Last changed    : 13/10/2006 09:30:01 by General sequence
Sample Info     : CM1.41c OH racemate
                                           IA column, 1 ml/min, 80:20 Heptane/EtOH
=====
  
```

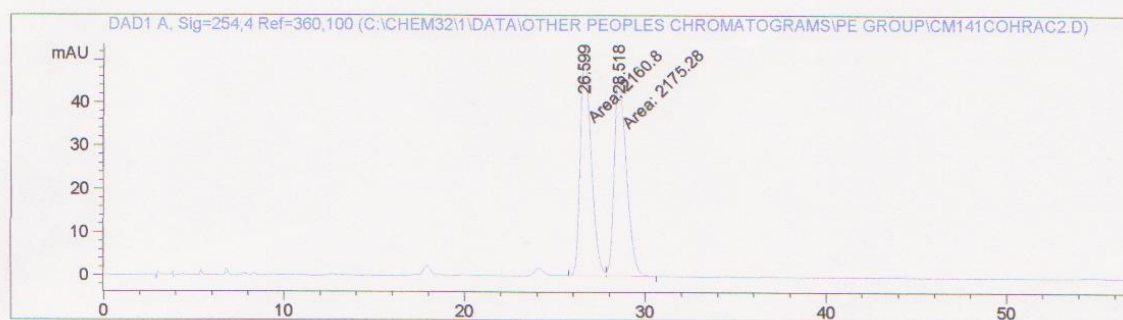

## Area Percent Report

```

=====
Sorted By      :      Signal
Multiplier     :      1.0000
Dilution       :      1.0000
Use Multiplier & Dilution Factor with ISTDs
=====
  
```

Signal 1: DAD1 A, Sig=254,4 Ref=360,100

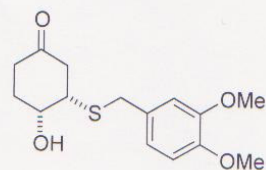

| Peak # | RetTime [min] | Type | Width [min] | Area [mAU*s] | Height [mAU] | Area %  |
|--------|---------------|------|-------------|--------------|--------------|---------|
| 1      | 26.599        | MF   | 0.7048      | 2160.79614   | 51.09860     | 49.8330 |
| 2      | 28.518        | FM   | 0.7835      | 2175.27783   | 46.27520     | 50.1670 |

```
Totals :                      4336.07397  97.37380
```

\*\*\* End of Report \*\*\*



```
=====
Acq. Operator   : General sequence          Seq. Line :    7
Acq. Instrument : Instrument 1              Location  : Vial 1
Injection Date  : 11/08/2008 22:19:48      Inj       :    1
                                           Inj Volume: 5 µl
Different Inj Volume from Sequence !      Actual Inj Volume : 2 µl
Acq. Method     : C:\Chem32\1\DATA\SEQUENCE DATA\GENERAL SEQUENCE1 2008-08-11 19-42-54\
                                           MULTI_ISO_60_MIN_80_20_1ML.M
Last changed    : 13/10/2006 09:30:01 by General sequence
Analysis Method : C:\CHEM32\1\DATA\OTHER PEOPLES CHROMATOGRAMS\PE GROUP\CM141COHEE2.D\DA
                                           (MULTI_ISO_60_MIN_80_20_1ML.M)
Last changed    : 13/10/2006 09:30:01 by General sequence
Sample Info     : CM1.41c OH ee
                                           IA column, 1 ml/min, 80:20 Heptane/EtOH
=====
```

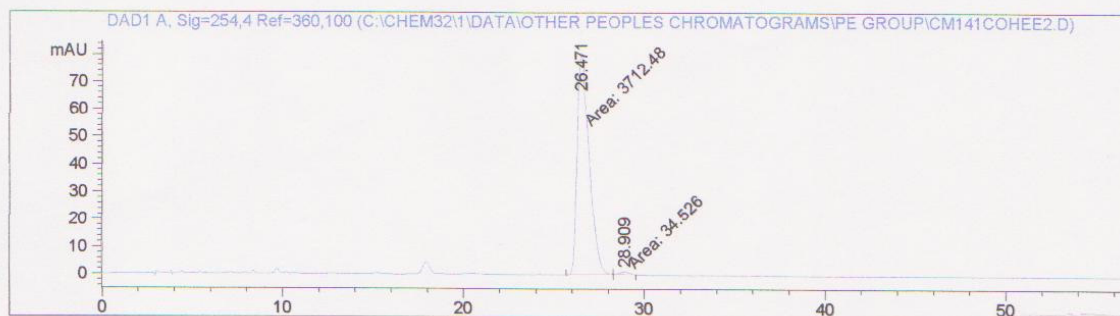

# Area Percent Report

```
Sorted By      : Signal
Multiplier     : 1.0000
Dilution       : 1.0000
Use Multiplier & Dilution Factor with ISTDs
```

Signal 1: DAD1 A, Sig=254,4 Ref=360,100

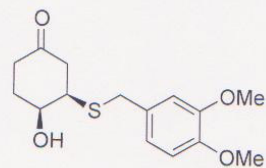

| Peak # | RetTime [min] | Type | Width [min] | Area [mAU*s] | Height [mAU] | Area %  |
|--------|---------------|------|-------------|--------------|--------------|---------|
| 1      | 26.471        | MM   | 0.7657      | 3712.47754   | 80.80398     | 99.0786 |
| 2      | 28.909        | MM   | 0.6181      | 34.52602     | 9.31008e-1   | 0.9214  |

Totals : 3747.00356 81.73499

\*\*\* End of Report \*\*\*

# Compound 17

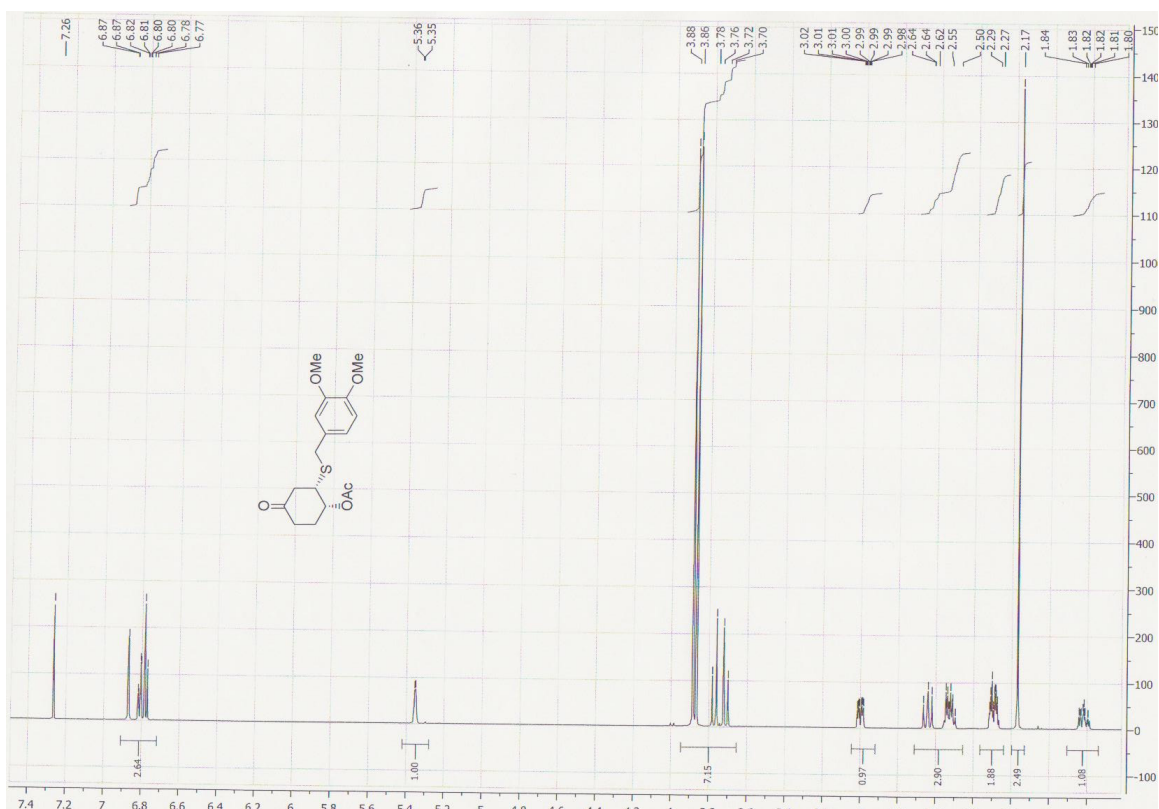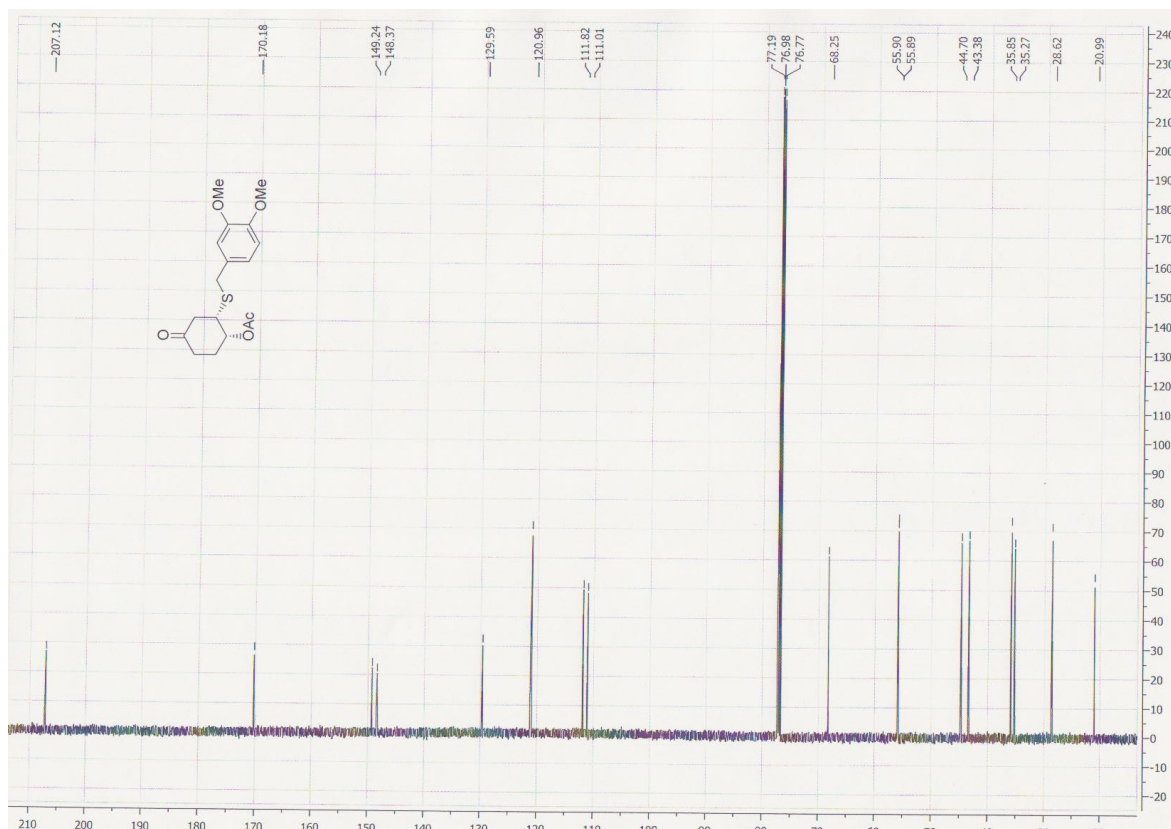

# HPLC traces *pseudo*-(±)- and (-)-17

```
=====
Acq. Operator   : General sequence                      Seq. Line :   12
Acq. Instrument : Instrument 1                          Location  : Vial 1
Injection Date  : 21/07/2008 15:39:45                  Inj       :    1
                                                    Inj Volume: 5 µl

Acq. Method     : C:\Chem32\1\DATA\SEQUENCE DATA\GENERAL SEQUENCE1 2008-07-21 12-57-40\
                  MULTI_ISO_15_MIN_80_20_1ML.M
Last changed    : 18/10/2006 09:49:28 by General sequence
Analysis Method : C:\CHEM32\1\DATA\OTHER PEOPLES CHROMATOGRAMS\PE GROUP\CM01RACIA3.D\DA.
                  (MULTI_ISO_15_MIN_80_20_1ML.M)
Last changed    : 18/10/2006 09:49:28 by General sequence
Sample Info     : CM Acetate racemate
                  IA column, isocratic 80:20 heptane/EtOH, 1 ml/min
=====
```

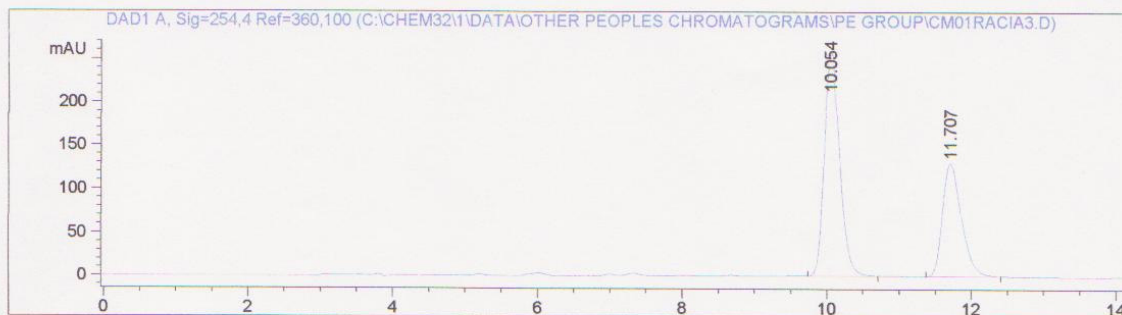

## Area Percent Report

```
=====
Sorted By      : Signal
Multiplier     : 1.0000
Dilution       : 1.0000
Use Multiplier & Dilution Factor with ISTDs
=====
```

Signal 1: DAD1 A, Sig=254,4 Ref=360,100

| Peak # | RetTime [min] | Type | Width [min] | Area [mAU*s] | Height [mAU] | Area %  |
|--------|---------------|------|-------------|--------------|--------------|---------|
| 1      | 10.054        | BB   | 0.2268      | 3817.70654   | 257.73911    | 61.4493 |
| 2      | 11.707        | BB   | 0.2804      | 2395.06934   | 130.35056    | 38.5507 |

Totals : 6212.77588 388.08966

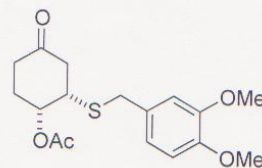

\*\*\* End of Report \*\*\*



```
=====
Acq. Operator   : General sequence          Seq. Line :   15
Acq. Instrument : Instrument 1              Location  : Vial 4
Injection Date  : 21/07/2008 16:29:17      Inj       :    1
                                           Inj Volume: 5 µl

Acq. Method     : C:\Chem32\1\DATA\SEQUENCE DATA\GENERAL SEQUENCE1 2008-07-21 12-57-40\
                  MULTI_ISO_15_MIN_80_20_1ML.M
Last changed    : 18/10/2006 09:49:28 by General sequence
Analysis Method : C:\CHEM32\1\DATA\OTHER PEOPLES CHROMATOGRAMS\PE GROUP\CM131SMIA3.D\DA.
                  (MULTI_ISO_15_MIN_80_20_1ML.M)
Last changed    : 18/10/2006 09:49:28 by General sequence
Sample Info     : CM-1.31 Acetate SM
                  IA column, isocratic 80:20 heptane/EtOH, 1 ml/min
=====
```

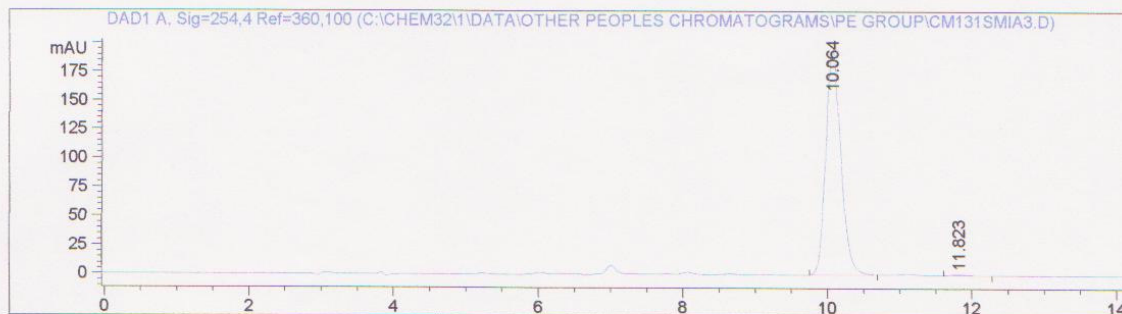

# Area Percent Report

```
Sorted By      : Signal
Multiplier     : 1.0000
Dilution       : 1.0000
Use Multiplier & Dilution Factor with ISTDs
```

Signal 1: DAD1 A, Sig=254,4 Ref=360,100

| Peak # | RetTime [min] | Type | Width [min] | Area [mAU*s] | Height [mAU] | Area %  |
|--------|---------------|------|-------------|--------------|--------------|---------|
| 1      | 10.064        | BB   | 0.2265      | 2859.15869   | 193.41830    | 99.4557 |
| 2      | 11.823        | BB   | 0.2491      | 15.64751     | 1.00795      | 0.5443  |

Totals : 2874.80620 194.42625

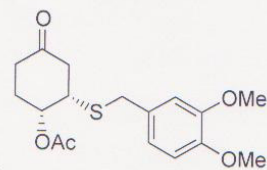

\*\*\* End of Report \*\*\*

# Compound 18

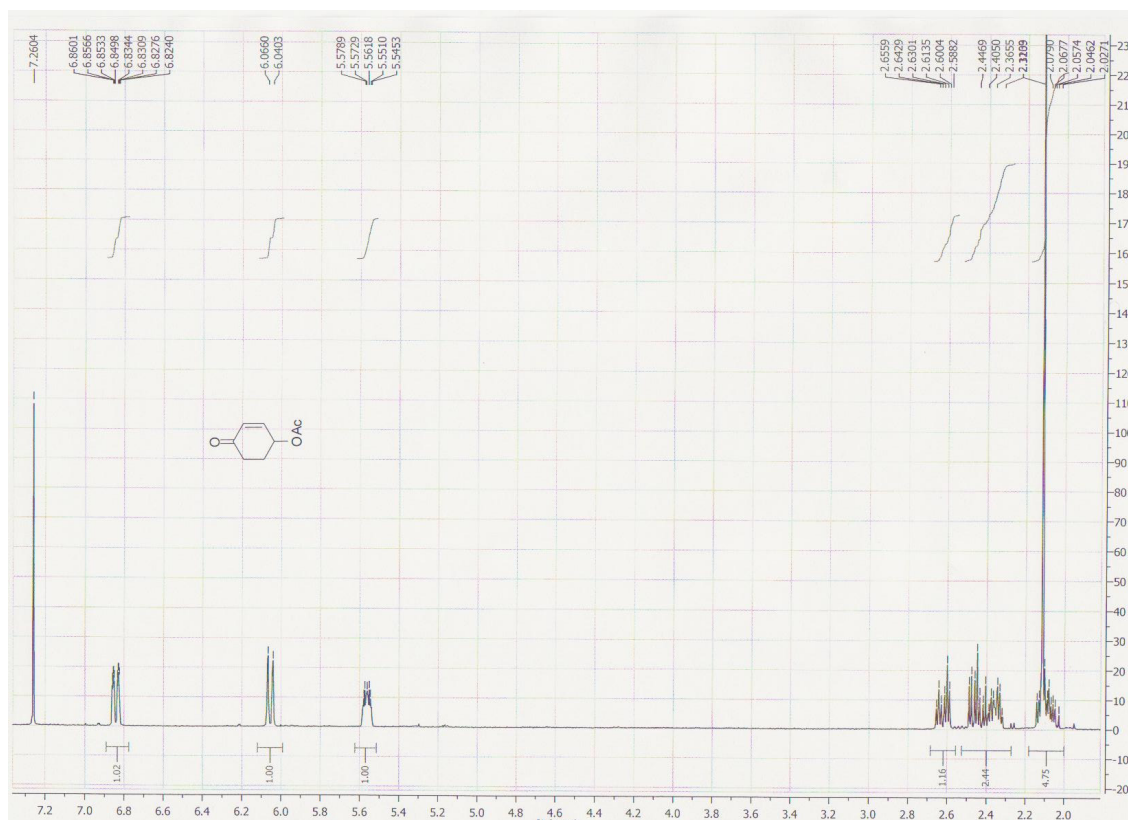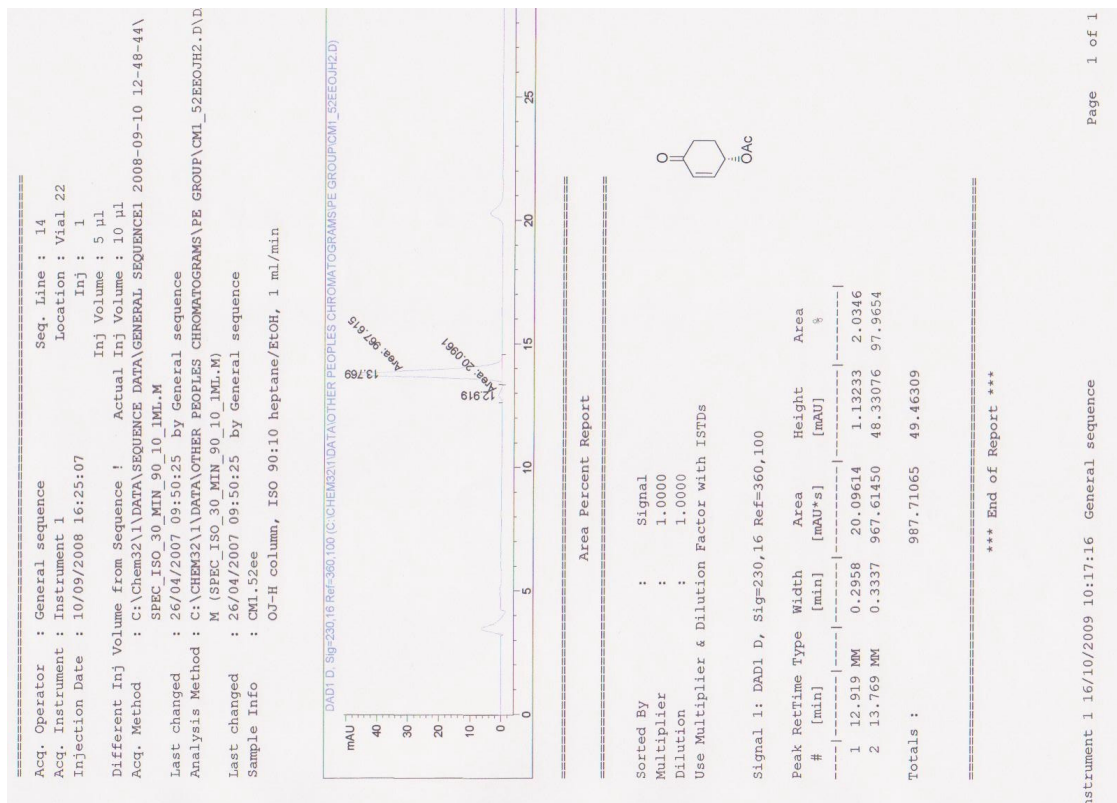



# Compound 19

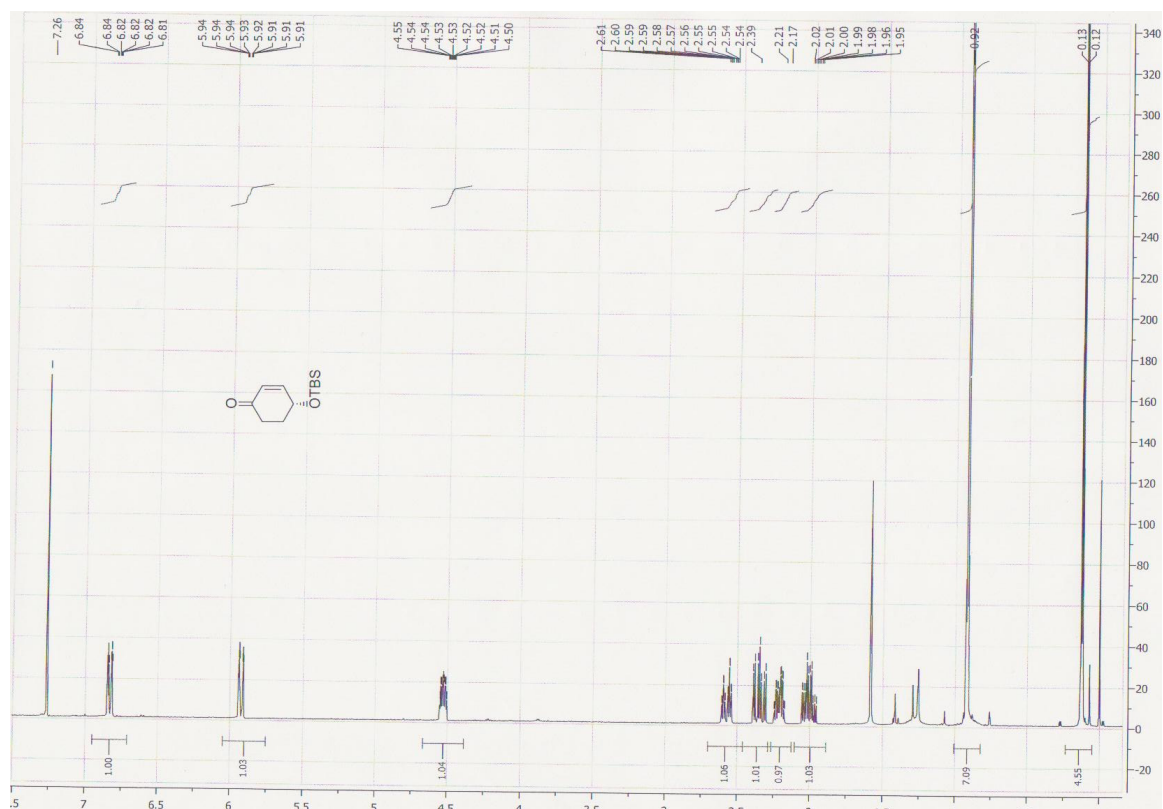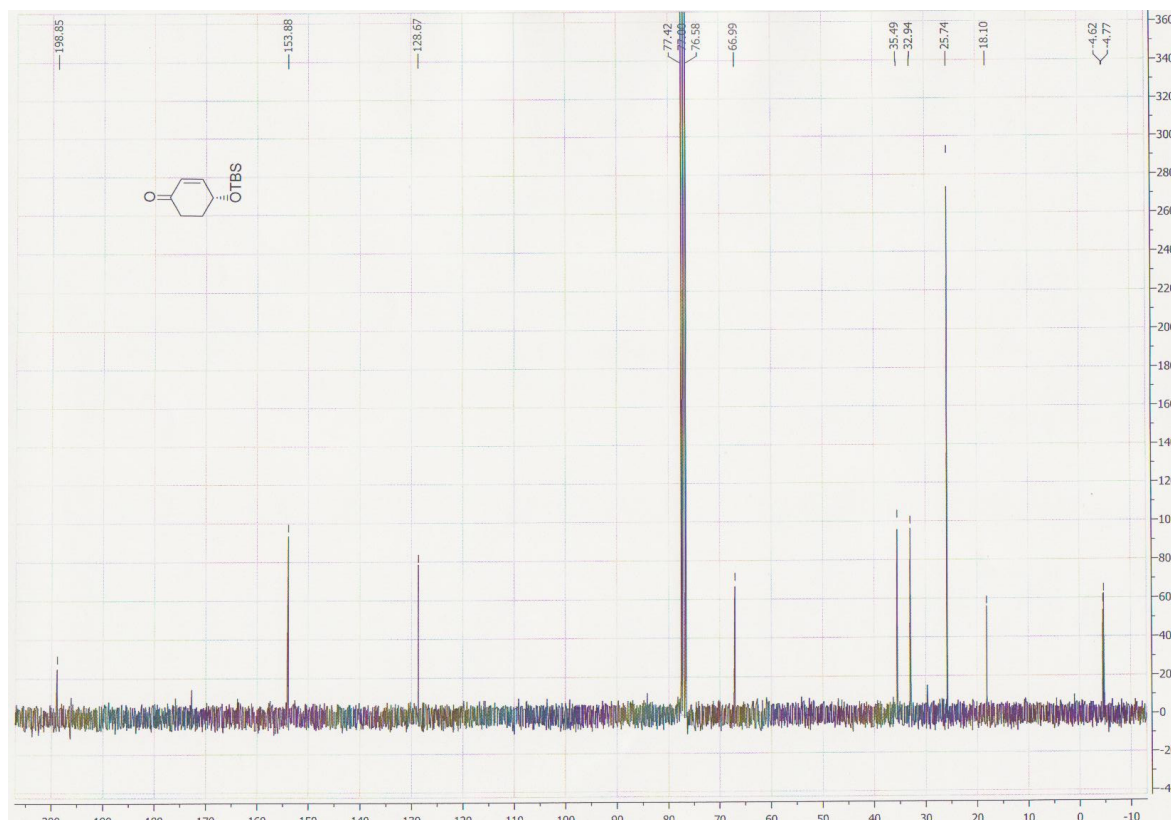

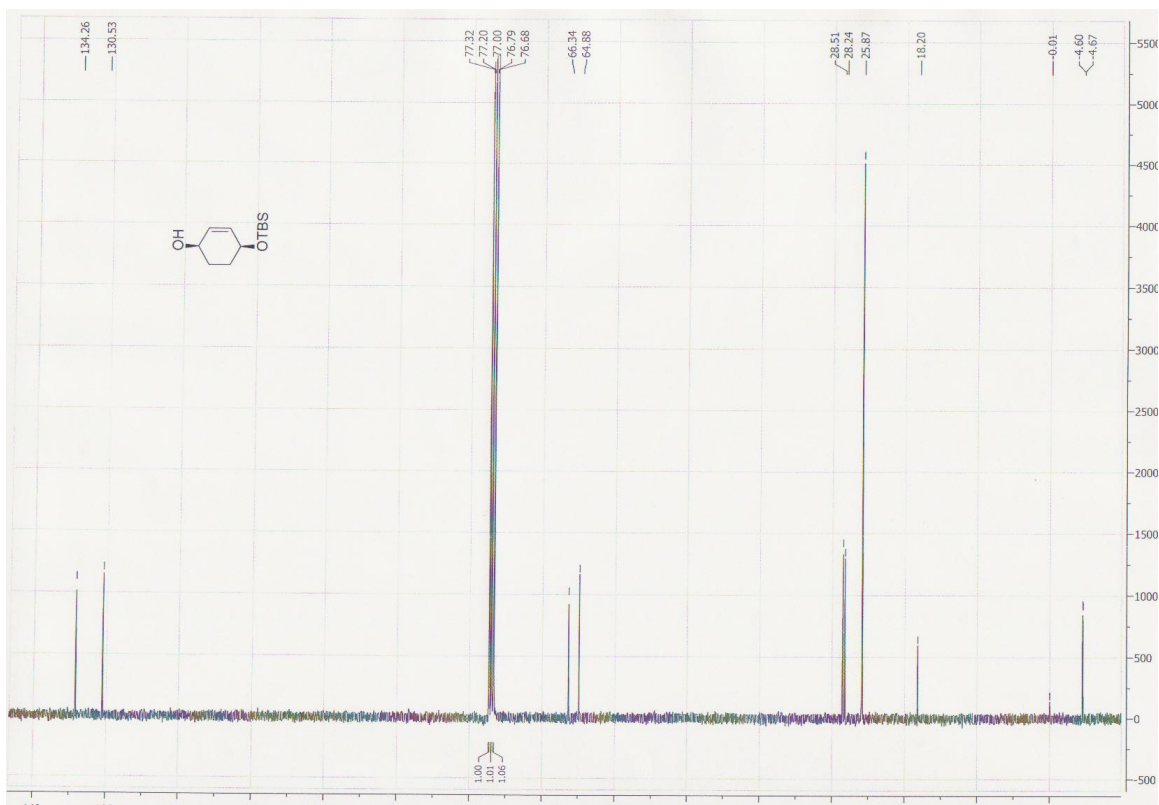

# Compound 21

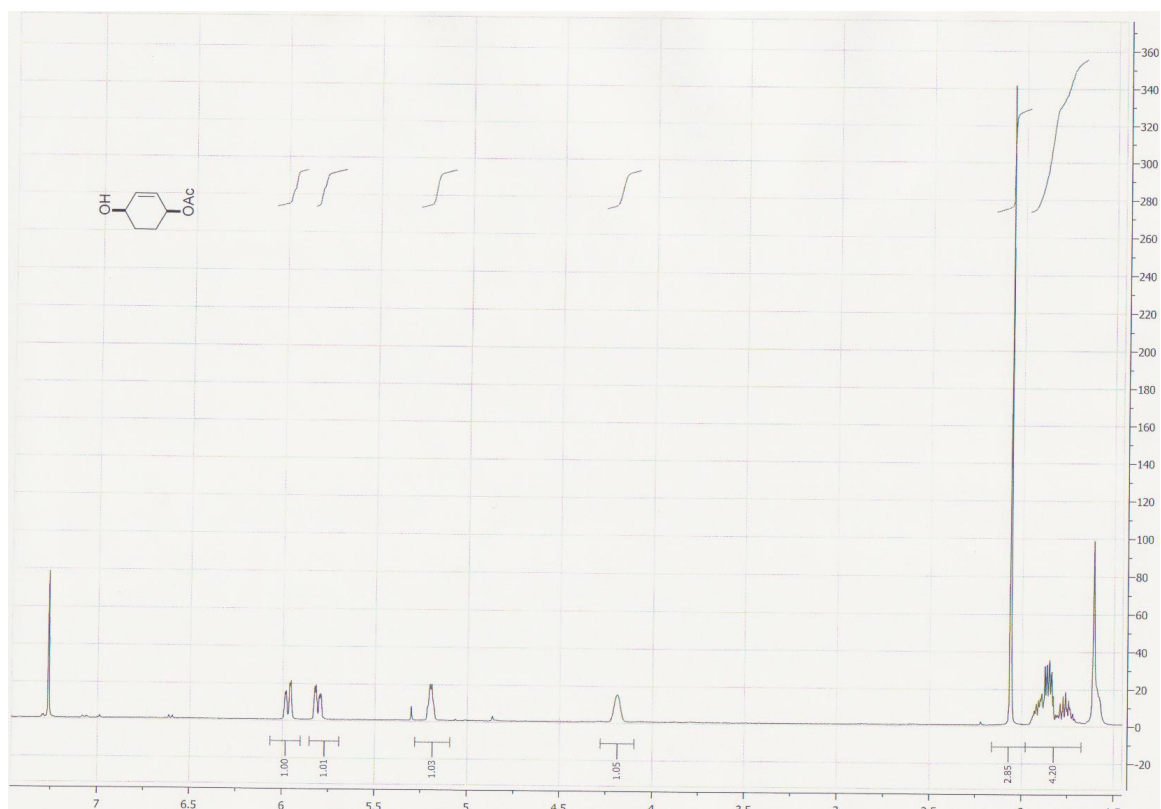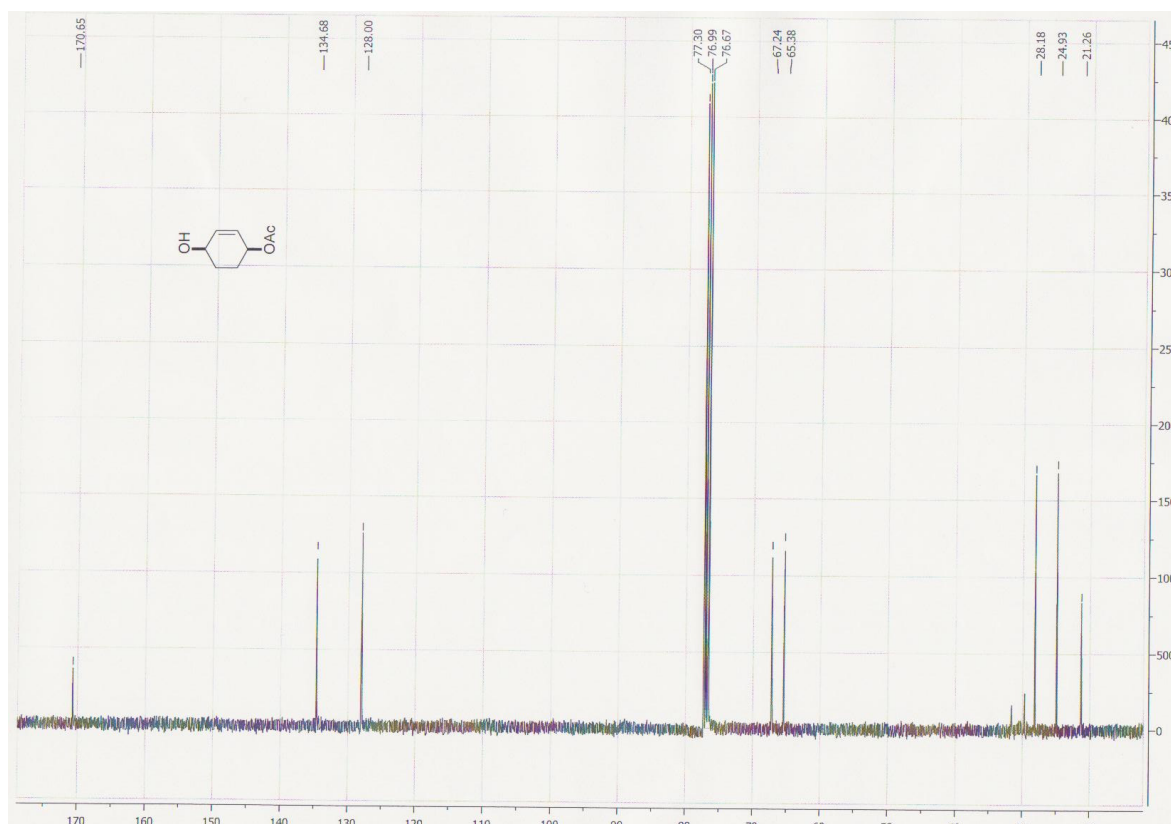



Compound 22

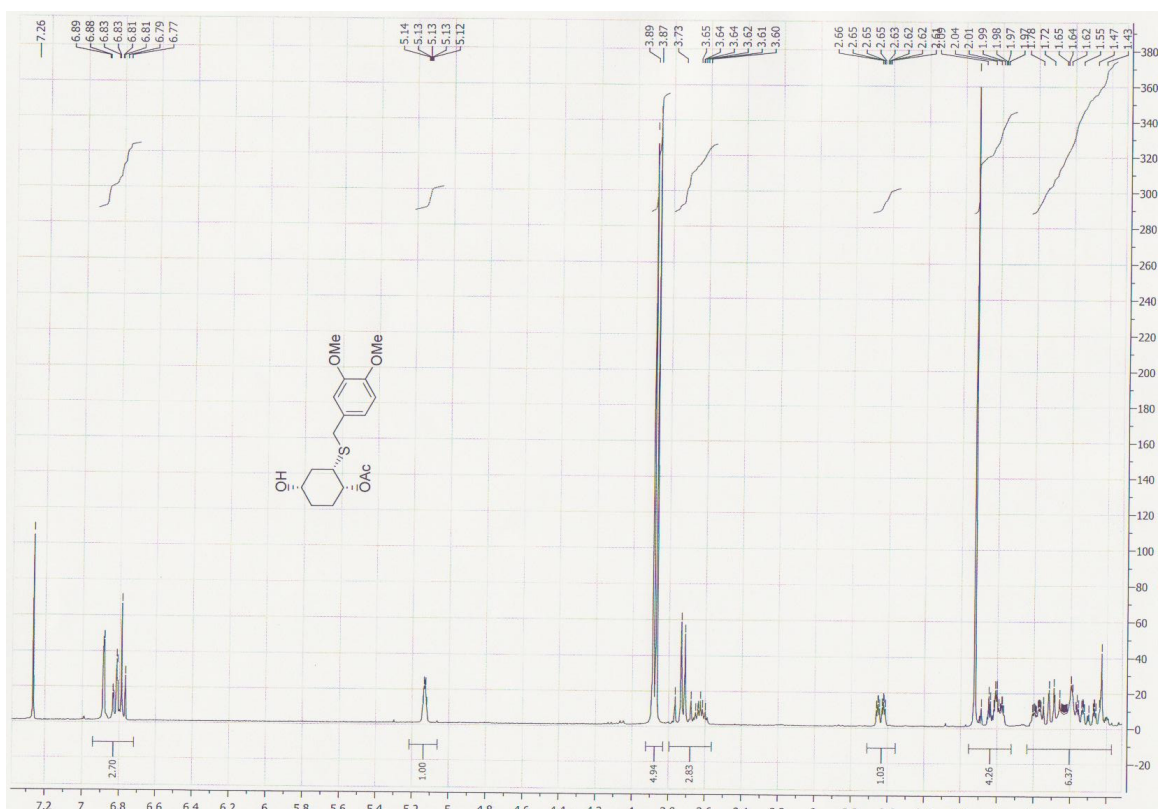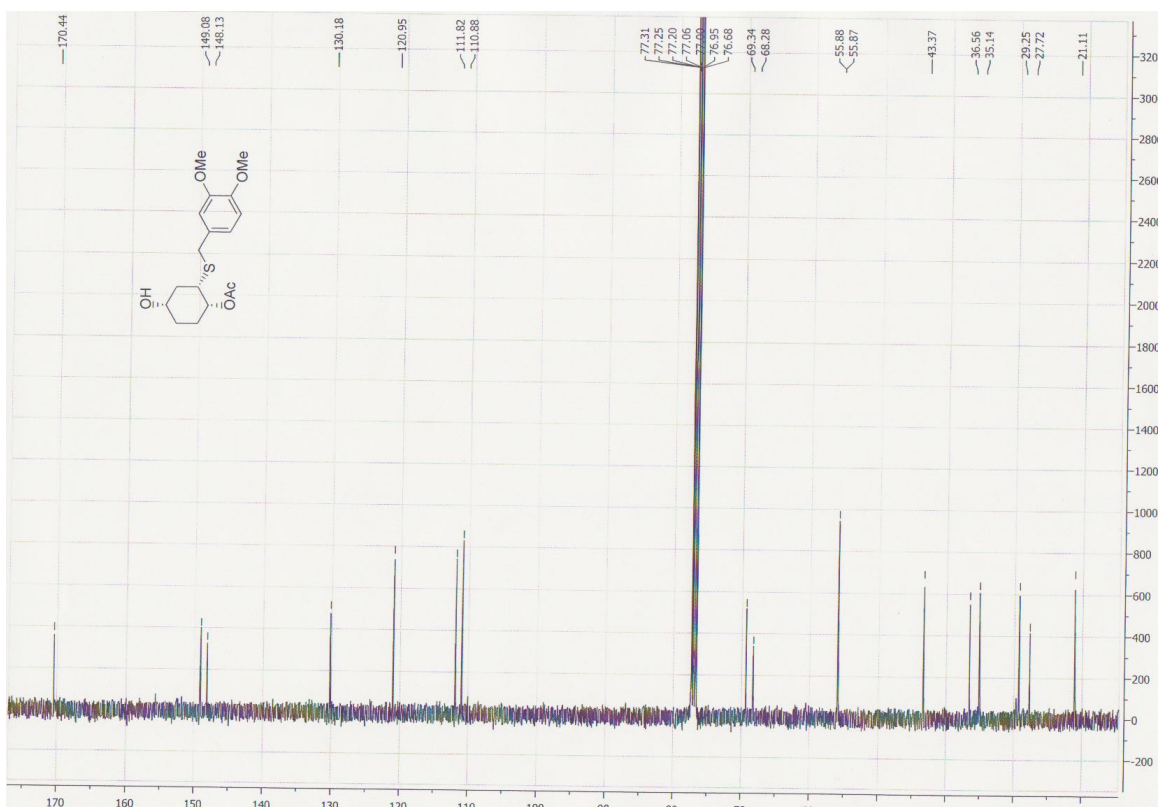

Compound 23

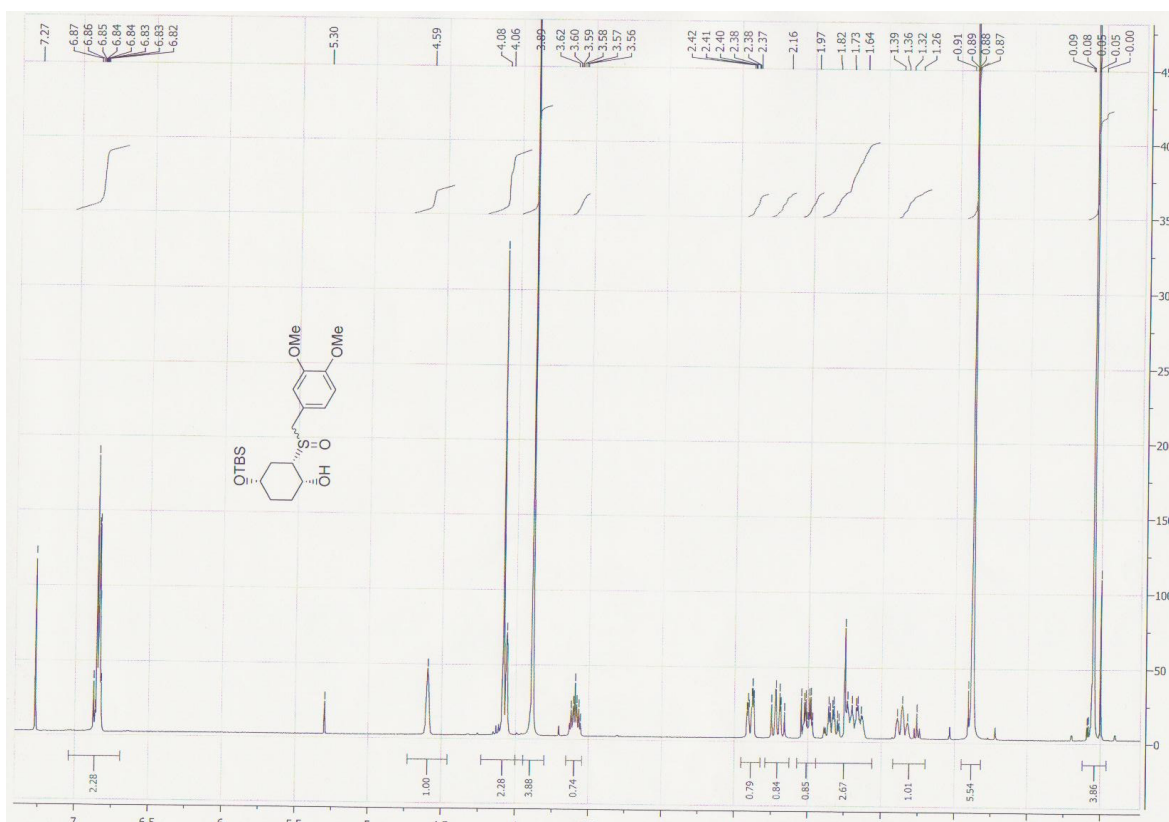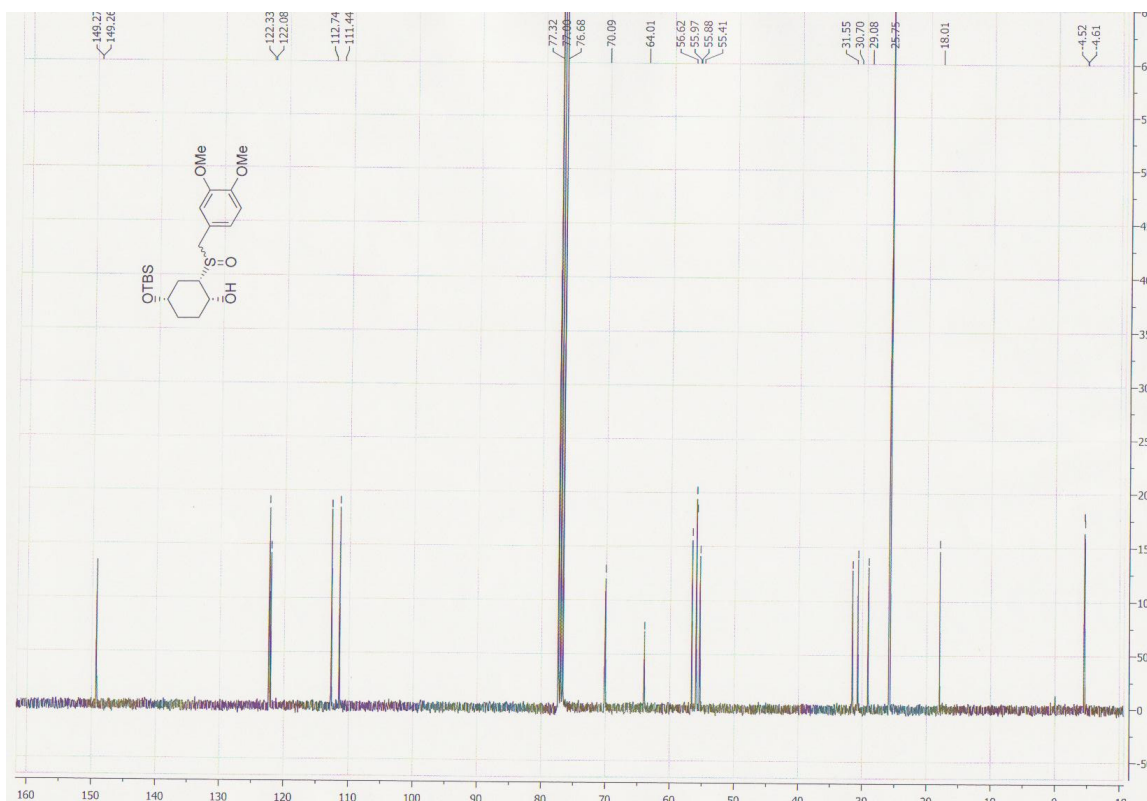

# Compound 24

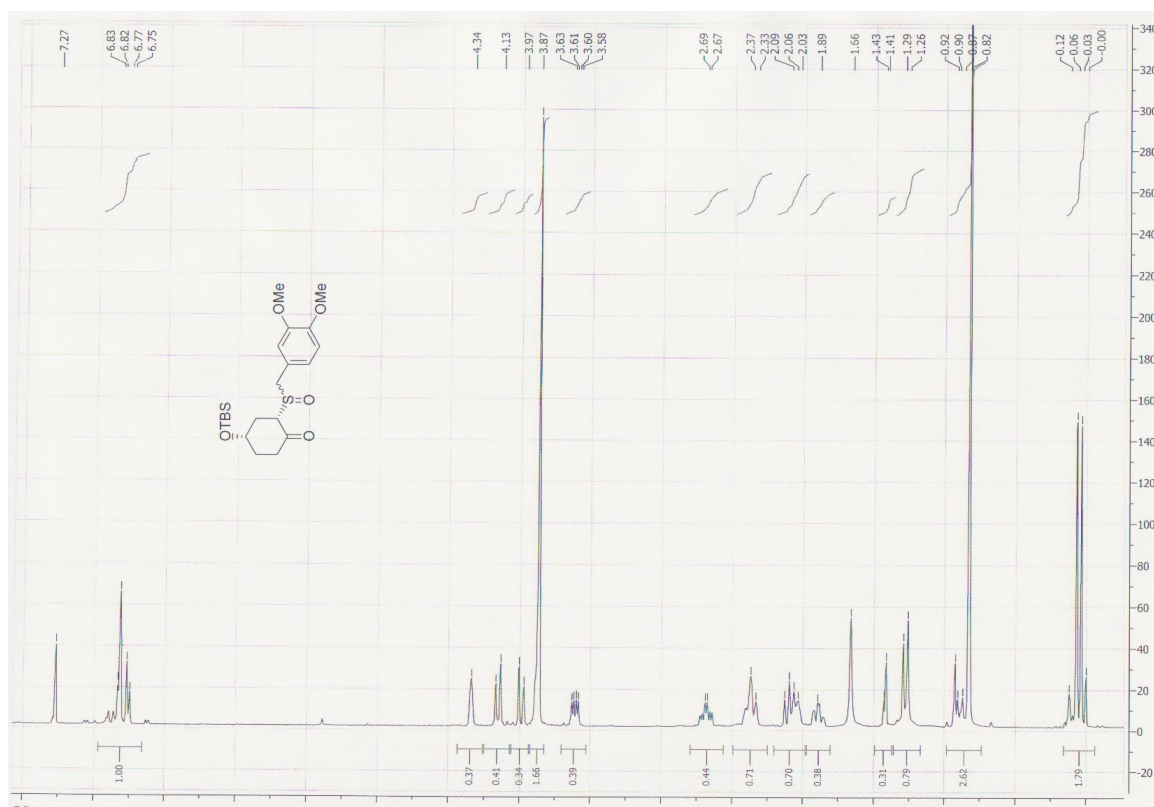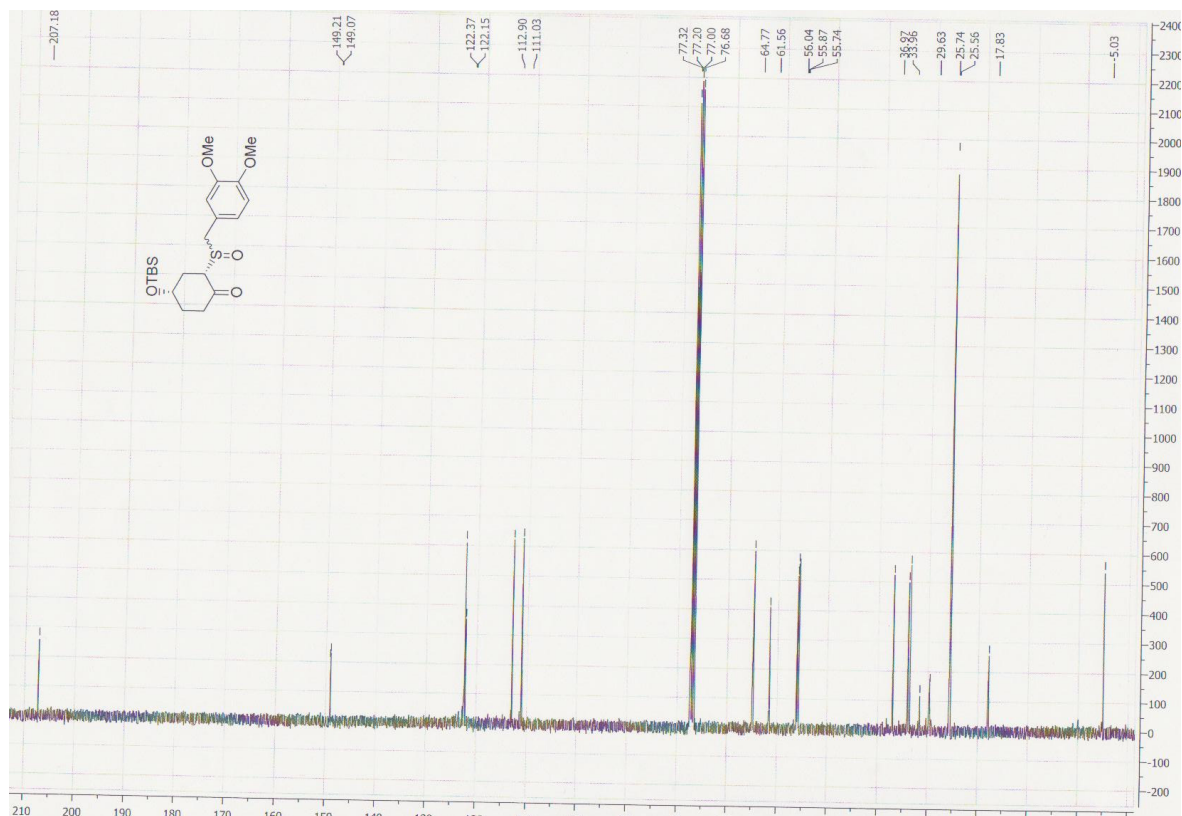

Supplement: b916506a.pdf [file b916506a.pdf]
